## ■ REVIEW ARTICLE

Dennis M. Fisher, M.D., Editor

Anesthesiology

1998; 88:1365-86

© 1998 American Society of Anesthesiologists, Inc.

Lippincott-Raven Publishers

# Carbon Dioxide and the Cerebral Circulation

Johnny E. Brian, Jr., M.D.\*

THE arterial partial pressure of carbon dioxide ( $P_{aCO_2}$ ) is an important regulator of the cerebral circulation, and a large body of literature describes this relation. This review summarizes the current state of knowledge of the effect of  $CO_2$  on cerebral physiology, focusing first on mechanisms of  $CO_2$ -induced alteration of vascular tone, then on the effect of  $CO_2$  on cerebral vascular regulation, and finally on  $CO_2$  manipulation in patient care.

## Mechanisms

This section summarizes information regarding the site of action of  $CO_2$  on the cerebral circulation and cellular mechanisms important in  $CO_2$ -mediated changes in cerebral vascular tone. The  $CO_2$ -mediated alteration of brain extracellular pH is the initial step leading to changes in vascular tone. The effect of pH on cerebral vascular tone is mediated by nitric oxide (NO), prostanoids, cyclic nucleotides, potassium channels, and intracellular calcium. Most data available support an important role for each of these mediators in the response of the cerebral circulation to  $CO_2$ . However, contradictory data exist, and there is no comprehensive understanding of how these mediators interact to control cerebral vascular tone. Further, mechanisms differ in neonates and adults.

### Site of Action of Carbon Dioxide

Increased carbon dioxide tension ( $P_{CO_2}$ ) relaxes cerebral arteries *in vitro*, which indicates that  $CO_2$  can

cause cerebral vascular relaxation independent of extravascular cells.<sup>1,2</sup> *In vivo*, cerebral arteries respond to highly localized perivascular alteration of  $P_{CO_2}$  and pH, which indicates that the mechanisms that affect cerebral vascular tone are localized to the area of the blood vessel wall.<sup>3-5</sup> Cellular elements that could contribute to the cerebral vascular response to  $CO_2$  include vascular cells (endothelium and smooth muscle) and extravascular cells (perivascular nerves, parenchymal neurons, and glia). In adult animals, removal of the endothelium *in vitro*<sup>1</sup> or endothelial damage *in vivo*<sup>6</sup> does not alter the response of cerebral arteries to hypercapnia. This suggests that in adults the endothelium is not involved in the response to  $CO_2$ . In neonates, however, the endothelium does contribute to cerebral vasodilation during hypercapnia.<sup>7,8</sup> Tetrodotoxin, which blocks sodium channels and prevents neuronal depolarization, does not reduce  $CO_2$ -mediated cerebral vasodilation, indicating that depolarization of perivascular nerves or parenchymal neurons is not important.<sup>6,9</sup> Selective destruction of cortical neurons also does not alter the cerebral vascular response to hypercapnia.<sup>10</sup> Although these data in adults suggest that the endothelium, parenchymal neurons, and perivascular nerves are not important during hypercapnia-induced cerebral vasodilation, it is also possible that these cells produce overlapping vasodilator messengers, and removal of an individual messenger is not sufficient to alter the response. No data exist regarding a potential role for glia in the  $CO_2$  response of the cerebral circulation.

*In vitro* data suggest that extravascular cells are not important in the response of cerebral arteries to increased  $P_{aCO_2}$ . However, the relative contribution of vascular and extravascular cells to  $CO_2$ -mediated vasodilation cannot be assessed by comparing *in vivo* and *in vitro* studies. Although isolated cerebral vessels relax with increased  $P_{CO_2}$ , technical differences between *in vivo* and *in vitro* studies make it impossible to know if vasodilation is equal in isolated vessels compared with

\* Associate Professor.

Received from the Department of Anesthesia, The University of Iowa, Iowa City, Iowa. Submitted for publication February 14, 1997. Accepted for publication December 29, 1997.

Address reprint requests to Dr. Brian: Department of Anesthesia, The University of Iowa, 200 Hawkins Drive, Iowa City, Iowa 52242. Address electronic mail to: eddie-brian@uiowa.edu

Key words: Brain; blood flow; hypercapnia; hyperventilation; hypocapnia; intracranial pressure; mechanisms; review.



*in vivo* blood vessels. Thus, *in vivo*, it is possible that dilation is larger, and some of the effect of CO<sub>2</sub> on cerebral vessels is mediated by extravascular cells.

### pH

When cerebral vascular tone is altered by a change in P<sub>CO<sub>2</sub></sub>, it is possible that CO<sub>2</sub> itself, a CO<sub>2</sub>-mediated change in pH, or both are signals leading to a change in vascular tone. Applying acidotic or alkalotic solutions to the brain dilates or constricts cerebral arteries *in vivo*, which indicates that pH can affect cerebral vascular tone.<sup>4</sup> In humans, Severinghaus *et al.*<sup>11</sup> showed that cerebral blood flow (CBF) was normal during chronic hypocapnia, which suggests that CO<sub>2</sub> itself does not alter cerebral vascular tone. Kontos *et al.*<sup>3,12</sup> offered the best evidence that pH rather than CO<sub>2</sub> is the controlling messenger for CO<sub>2</sub>-mediated alterations of cerebral vascular tone. Applying artificial cerebrospinal fluid (CSF) topically to the cerebral cortex of anesthetized cats, they showed that the diameter of cerebral arterioles responded only to changes in pH, regardless of fluid P<sub>CO<sub>2</sub></sub>. During alterations of fluid P<sub>CO<sub>2</sub></sub>, the pH of the artificial CSF was held constant by altering its bicarbonate concentration. Because CO<sub>2</sub> diffuses freely through cell membranes and bicarbonate does not, these data suggest that extracellular pH is more important than intracellular pH in altering cerebral vascular tone. Data in isolated cerebral arteries also indicate that extracellular pH is more important than intracellular pH in hypercapnic-induced dilation of cerebral arteries.<sup>13</sup> However, changes in extracellular pH do affect intracellular pH in cerebral vascular smooth muscle,<sup>13</sup> and due to complex interactions between extracellular and intracellular pH,<sup>14</sup> it is not known whether extracellular or intracellular pH controls cerebral vascular tone.

### Cellular Mechanisms

Changes in pH can exert effects on smooth muscle tone through second messenger systems and by altering vascular smooth muscle calcium concentration directly. This section reviews the role of prostanoids, NO, cyclic nucleotides, potassium channels, and intracellular calcium concentration in CO<sub>2</sub>-mediated changes in cerebral vascular tone.

**Prostanoids.** Production of prostaglandins is controlled by the availability of arachidonic acid, which is cleaved from membrane lipids by phospholipase. Cyclo-oxygenase converts arachidonic acid to prostaglandin H<sub>2</sub>, which is subsequently modified by other enzymes

to yield both vasoconstrictor and vasodilator prostanoids. The principle vasoactive prostanoids in the brain are prostaglandin E<sub>2</sub> (PGE<sub>2</sub>) and prostacyclin (PGI<sub>2</sub>), both dilator prostanoids, and the constrictor prostanoid prostaglandin F<sub>2α</sub> (PGF<sub>2α</sub>).<sup>15</sup> In adult humans and animals, some studies reported that indomethacin, a cyclo-oxygenase inhibitor, reduces hypercapnia-induced cerebral vasodilation.<sup>16-19</sup> However, other studies reported that indomethacin does not reduce hypercapnia-induced cerebral vasodilation.<sup>20-23</sup> Although indomethacin reduces hypercapnia-induced increase in CBF in humans, aspirin and naproxen have no effect, even when there is an equal degree of cyclo-oxygenase inhibition.<sup>16</sup> Other have reported in animals and humans that the cyclo-oxygenase inhibitors aspirin, sulindac, amfenac, and diclofenac do not alter the response of the cerebral circulation to hypercapnia.<sup>19,20,24,25</sup> In adult humans and animals, brain arachidonic acid, PGI<sub>2</sub>, and PGE<sub>2</sub> concentrations do not increase during hypercapnia.<sup>16,26-28</sup> Overall, data in adults indicate that cyclo-oxygenase products are not responsible for cerebral vasodilation during hypercapnia. The effect of indomethacin on hypercapnia-induced cerebral vasodilation is difficult to resolve. However, indomethacin does inhibit enzymes other than cyclo-oxygenase, including phosphodiesterase, phospholipase A<sub>2</sub>, and cyclic adenosine monophosphate (cAMP)-dependent protein kinase, which indicate that the effect of indomethacin is nonselective.<sup>26</sup>

The neonatal and adult cerebral circulation responds to CO<sub>2</sub> in a similar way, although the magnitude of the response may be less in neonates (see below). In neonates, prostanoids are important in regulating the cerebral circulation.<sup>29</sup> In neonatal animals, damage *in vivo* to cerebral vascular endothelium prevents hypercapnia-mediated increases in CSF PGI<sub>2</sub> concentration and dilation of cerebral blood vessels.<sup>8</sup> Inhibition of phospholipase, which prevents the release of arachidonic acid and the production of prostanoids, abolishes the response of the neonatal circulation to hypercapnia and extracellular acidosis.<sup>30</sup> Further, indomethacin inhibits hypercapnia-induced cerebral vasodilation and increases in CSF PGI<sub>2</sub> and PGE<sub>2</sub> concentrations in newborn animals.<sup>31,32</sup> In human neonates, indomethacin abolishes hypercapnic-induced increases in CBF.<sup>33</sup> These data support the concept that in neonates, vasodilator prostaglandins derived from the vascular endothelium are important in the response to hypercapnia. However, an alternative role for prostaglandins has



been suggested by some investigators, who report in newborn animals that after inhibition of cyclo-oxygenase or endothelial injury, application to the brain of a very low concentration of vasodilator prostanoids restores hypercapnia-induced cerebral vasodilation.<sup>7,34</sup> These data suggest that prostanoids may not be direct mediators of hypercapnia-induced cerebral vasodilation, but rather that a basal level of prostanoids is necessary to "permit" hypercapnia to dilate cerebral blood vessels. Overall, data indicate that cyclo-oxygenase products are important regulators in the hypercapnic response of the newborn but not adult cerebral circulation.

**Nitric Oxide.** Nitric oxide is an important regulator of cerebral vascular tone and is produced by a family of NO-synthase enzymes in brain vascular endothelial cells, some perivascular nerves, parenchymal neurons, and glia.<sup>35,36</sup> Nitric oxide activates guanylate cyclase in vascular smooth muscle, increasing the intracellular concentration of cyclic guanosine monophosphate (cGMP), causing vasorelaxation.<sup>36</sup> In adult animals, inhibition of NO-synthase activity reduces cerebral vasodilation during hypercapnia<sup>37-41</sup> and extracellular acidosis-mediated cerebral vasodilation.<sup>39</sup> This indicates that NO is one vasodilator important in the response of the cerebral circulation to hypercapnia and acidosis. Although these studies indicate that NO is important in CO<sub>2</sub>-induced cerebral vasodilation, they also suggest that NO is not the only vasodilator signal, because after inhibition of NO-synthase, 10-70% of hypercapnia-mediated cerebral vasodilation remains. The wide range in the reduction of cerebral vasodilation may reflect use of different NO-synthase inhibitors, doses of inhibitors, timing of doses, degree of hypercapnia, and species differences. During severe hypercapnia (Pa<sub>CO<sub>2</sub></sub> >100 mmHg), CO<sub>2</sub>-mediated dilation of cerebral arterioles cannot be reduced by inhibition of NO-synthase, which indicates that cerebral vasodilation during severe hypercapnia does not depend on NO.<sup>37</sup> In contrast to adults, NO does not play a role in hypercapnia-induced cerebral vasodilation in neonatal animals.<sup>32</sup>

Although it might be surmised from these studies that hypercapnia increases the synthesis of NO, which leads to cerebral vasodilation, some investigations suggest an alternative explanation. The brain tonically produces NO, creating a constant vasodilator signal.<sup>36</sup> Inhibition of NO-synthase removes tonic NO and increases the resting tone in cerebral blood vessels, which could alter the response to other vasoactive signals, such as hyper-

capnia. Thus inhibition of NO-synthase could cause a direct effect by preventing hypercapnia-mediated activation of NO-synthase and indirect effects by reducing basal NO and cGMP levels and increasing resting tone of blood vessels. After inhibition of NO-synthase, low concentrations of NO-dependent and NO-independent vasodilators can restore cerebral vascular tone to baseline.<sup>9</sup> However, NO-dependent but not NO-independent vasodilators can restore the response to hypercapnia.<sup>9</sup> Furthermore, a cell-permeable cGMP analog can also restore basal vascular tone and the response to hypercapnia after inhibition of NO-synthase.<sup>9</sup> These data suggest that changes in basal tone are not important, because NO-independent vasodilators cannot restore the response to hypercapnia. These data indicate that NO and cGMP are important in CO<sub>2</sub>-mediated dilation of cerebral blood vessels. However, NO and cGMP may not be the final mediators of vasodilation, but rather that basal levels of NO and cGMP "permit" hypercapnia to dilate cerebral vessels. Nitric oxide may also function in a "permissive" role for other vasodilators in the cerebral circulation.<sup>42,43</sup>

In the brain, vascular endothelium expresses the endothelial isoform of NO-synthase, and some perivascular nerves, parenchymal neurons, and glia express the neuronal isoform of NO-synthase.<sup>36,44-46</sup> All are potential sources of NO important for hypercapnia-induced cerebral vasodilation.<sup>36</sup> Damage to vascular endothelium *in vivo* does not reduce hypercapnia-induced vasodilation,<sup>6</sup> which indicates that the endothelial isoform of NO-synthase is not the source of NO involved in hypercapnia-induced cerebral vasodilation. Selective inhibition of the neuronal isoform of NO-synthase reduces hypercapnia-induced cerebral vasodilation, which indicates that the activity of neuronal NO-synthase is important.<sup>47</sup> Cerebral perivascular nerves originating from the sphenopalatine ganglia release NO but do not appear to be important in hypercapnia, because destruction of these nerves does not alter the cerebral vascular response to hypercapnia.<sup>48</sup> Furthermore, tetrodotoxin, which blocks sodium channels and prevents neuronal depolarization, does not reduce hypercapnia-induced cerebral vasodilation.<sup>9</sup> This indicates that the activation of neuronal NO-synthase by depolarization of perivascular nerves or parenchymal neurons is not important in hypercapnia-induced cerebral vasodilation. The NO responsible for hypercapnia-induced cerebral vasodilation could arise either from parenchymal neurons producing NO in the absence of depolarization or from



glia. However, selective destruction of cortical neurons does not alter hypercapnia-induced cerebral vasodilation, which indicates that parenchymal neurons are not involved in the response to hypercapnia.<sup>10</sup> Thus data suggest that, in adult animals, the vascular endothelium, parenchymal neurons, and perivascular nerves are not the source of NO important in hypercapnia-mediated vasodilation. Neuronal NO-synthase appears to be the source of NO involved in hypercapnia-induced cerebral vasodilation, but the cellular location is not known. Glia, which express neuronal NO-synthase, could be the source of NO, but it is also possible that multiple, overlapping sources of NO may be involved in hypercapnia-induced cerebral vasodilation.

In contrast to hypercapnia, alterations in cerebral vascular tone during hypocapnia do not depend on NO. In adult rabbits and rats, cerebral vasoconstriction during hypocapnia is not altered by inhibition of NO-synthase.<sup>38,49</sup>

**Cyclic Nucleotides.** Changes in cyclic nucleotide concentrations are important in the signaling cascade leading from *pH* to changes in vascular smooth muscle tone. Nitric oxide activates guanylate cyclase in vascular smooth muscle, increasing the cGMP concentration while vasodilator prostanoids (PGE<sub>2</sub>, PGI<sub>2</sub>) activate adenylylate cyclase and increase the cAMP concentration.<sup>32,36</sup> In adult rats, hypercapnia increases brain cGMP concentration, consistent with the theory that hypercapnia increases NO production, which then increases cGMP.<sup>40</sup> However, in isolated cerebral arteries from adult rats, increased P<sub>CO<sub>2</sub></sub> relaxes arteries but does not increase cGMP, consistent with the "permissive" hypothesis in which increases in NO and cGMP are not required for CO<sub>2</sub>-mediated dilation of cerebral blood vessels.<sup>1</sup> Cyclic GMP is important in hypercapnia; however, as after inhibition of NO-synthase, infusion of a low concentration of a stable cGMP analog restores hypercapnia-induced vasodilation in the brain.<sup>9</sup> As with NO, it is not clear in adult animals whether cGMP functions as a vasodilator mediator during hypercapnia or whether basal levels of cGMP are necessary to "permit" hypercapnia-induced cerebral vasodilation to occur.

In neonatal pigs, hypercapnia causes cerebral vasodilation and increased brain PGI<sub>2</sub> and cAMP concentration; inhibition of cyclo-oxygenase prevents these changes.<sup>32</sup> These data suggest that cAMP mediates vasodilation during hypercapnia in neonates. Although vasodilator prostanoids can act permissively for hypercapnia

in neonates, it is not known whether cAMP can play a similar permissive role.

**Potassium Channels.** Recent evidence suggests that vascular smooth muscle potassium channels play an important role in regulating cerebral vascular tone.<sup>50</sup> In vascular smooth muscle, the opening of potassium channels allows potassium (the major intracellular cation) to diffuse out of the cell, making the interior of the cell more negative (hyperpolarized). When the cell is hyperpolarized, voltage-gated calcium channels reduce the influx of extracellular calcium, decreasing intracellular calcium concentration and reducing vascular smooth muscle tone.

One subgroup of potassium channels is ATP sensitive (K<sub>ATP</sub>). Decreasing *pH* increases the open-state probability of K<sub>ATP</sub> channels (which would hyperpolarize cells), supporting the concept that during hypercapnia, activation of K<sub>ATP</sub> channels could cause vascular smooth muscle hyperpolarization and cerebral vasodilation.<sup>51</sup> Furthermore, extracellular acidosis hyperpolarizes cerebral vascular smooth muscle, also supporting the concept that changes in vascular smooth muscle membrane potential are important during hypercapnia.<sup>2</sup> In large cerebral arteries *in vitro*, acidosis-induced relaxation depends partially on activation of K<sub>ATP</sub> channels.<sup>52</sup> In adult animals, cerebral vasodilation during modest (Pa<sub>CO<sub>2</sub></sub> ≈ 55 mmHg), but not marked, hypercapnia can be attenuated by blockade of K<sub>ATP</sub> channels.<sup>41,53</sup>

A second potassium channel is the large conductance calcium-activated potassium channel. This channel can be activated by cGMP and NO, hyperpolarizing vascular smooth muscle and reducing intracellular calcium.<sup>54,55</sup> It contributes to cGMP-dependent vasodilation in small cerebral arterioles<sup>56</sup> but not in large cerebral arteries.<sup>57</sup> In contrast to K<sub>ATP</sub> channels, large conductance calcium-activated potassium channels do not contribute to acidosis-induced vasodilation in isolated large cerebral arteries.<sup>52</sup> The lack of importance of these channels during acidosis-induced vasodilation in large cerebral arteries may reflect the regional heterogeneity of potassium channel distribution.

A third potassium channel is the delayed rectifier potassium channel (K<sub>v</sub>). This channel is normally activated by membrane depolarization, resulting in repolarization by allowing potassium to exit the cell.<sup>50</sup> In cerebral vascular smooth muscle, K<sub>v</sub> channels are *pH* sensitive, and acidosis increases K<sub>v</sub> conductance, hyperpolarizing the cell.<sup>58</sup> This suggests that K<sub>v</sub> channels should be activated during hypercapnia and contribute to dilation.



CO<sub>2</sub> AND THE CEREBRAL CIRCULATION

However, in isolated large cerebral arteries, blockade of K<sub>v</sub> channels does not alter dilation to acidosis.<sup>52</sup> As with large conductance calcium-activated potassium channels, this discrepancy may reflect regional differences in potassium channel distribution in the cerebral circulation.

**Intracellular Calcium.** Vascular smooth muscle tone is controlled by intracellular calcium concentration. Under baseline conditions, intracellular calcium is approximately 0.1  $\mu$ M, which is 10,000 times less than extracellular calcium. Small changes in plasma membrane calcium conductance may have a significant effect on both intracellular calcium concentration and vascular smooth muscle tone. During alkalosis, cerebral vascular smooth muscle intracellular calcium concentration increases, which increases tone.<sup>59</sup> In cerebral vascular smooth muscle, changes in extracellular pH affect intracellular calcium concentration and vascular tone.<sup>60</sup> Extracellular acidosis-induced dilation of cerebral arterioles can be prevented by elevation of extracellular calcium, which suggests that reduced entry of calcium into vascular smooth muscle is important in the reduction of vascular tone by acidosis.<sup>5</sup> Cyclic nucleotides (cAMP and cGMP) affect vascular tone in part by altering smooth muscle calcium concentration.<sup>54,61</sup> Both cAMP and cGMP appear to activate their respective protein kinases and phosphorylate calcium channels, which reduces the entry of calcium into vascular smooth muscle.<sup>61,62</sup> Cyclic nucleotides also activate potassium channels, leading to membrane hyperpolarization and inactivation of voltage-gated calcium channels, reducing intracellular calcium concentration.<sup>61</sup>

#### Summary of Mechanisms

The system of mediators that link extracellular pH to cerebral vascular tone is complex and interrelated (fig. 1). The initial step is alteration of extracellular pH, and the final common mediator is intracellular calcium concentration. In adults, cerebral vasodilation during hypercapnia is mediated in part by NO, which increases cGMP concentration. Cyclic GMP exerts several effects to decrease intracellular calcium, including activation of K<sub>ATP</sub> channels and the direct reduction of calcium entry through calcium channels. Nitric oxide can also activate potassium channels directly and thereby hyperpolarize and relax vascular smooth muscle. Some data suggest that NO and cGMP are not the direct mediators during hypercapnia but rather function in a "permissive" way to allow vasodilation. The cellular source

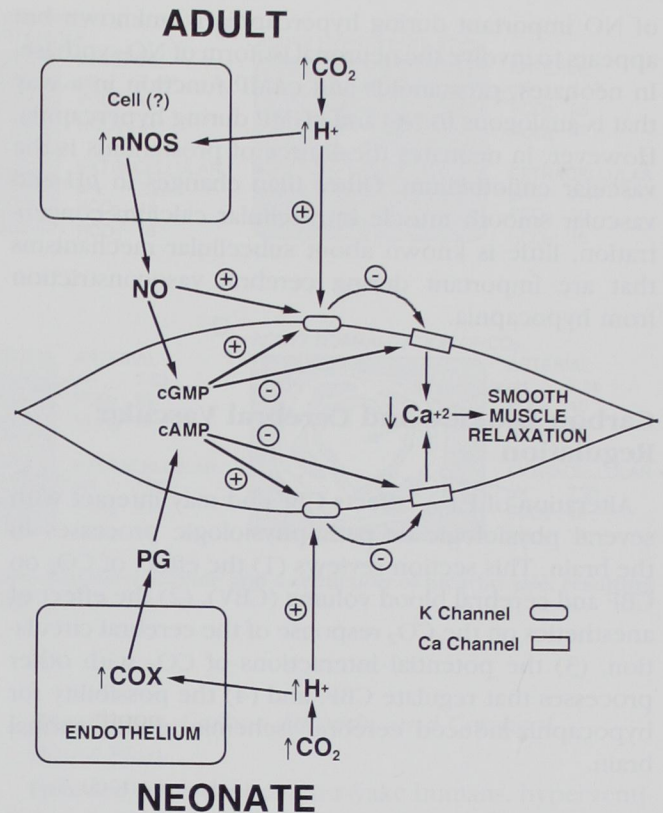

Fig. 1. Altering the partial pressure of carbon dioxide in arterial blood ( $P_{aCO_2}$ ) changes extracellular pH, which is the initial step leading to changes in vascular smooth muscle (VSM) intracellular calcium concentration and vascular tone. In adult animals, hypercapnia may activate the neuronal isoform of NO-synthase (nNOS), increasing NO production and cyclic guanosine monophosphate (cGMP) concentration in VSM. Both NO and cGMP can activate potassium channels, which hyperpolarize VSM. Membrane hyperpolarization inhibits voltage-gated calcium channels, which reduces VSM intracellular calcium concentration and causes vascular relaxation. In addition, cGMP can inhibit calcium channels directly and reduce intracellular calcium concentration in VSM. In adult humans, the cellular location of nNOS is not known. Further, some data suggest that in adults, NO and cGMP may not function as vasodilators during hypercapnia, but rather basal levels of NO and cGMP are necessary to "permit" hypercapnic vasodilation (see the text for further details). Extracellular acidosis can also activate potassium channels directly, hyperpolarizing VSM and reducing intracellular calcium concentration. During hypercapnia in neonates, cyclo-oxygenase, located in the vascular endothelium, may increase the production of vasodilator prostaglandins, which then activate adenylate cyclase, producing cyclic adenosine monophosphate (cAMP) in VSM. However, as with NO in adults, prostaglandins may function in a permissive role for hypercapnic-induced cerebral vasodilation in neonates. Little is known about the mechanism of hypocapnic-induced cerebral vasoconstriction, other than changes in extracellular pH and VSM intracellular calcium concentration.



of NO important during hypercapnia is unknown but appears to involve the neuronal isoform of NO-synthase. In neonates, prostanoids and cAMP function in a way that is analogous to NO and cGMP during hypercapnia. However, in neonates the source of prostanoids is the vascular endothelium. Other than changes in  $pH$  and vascular smooth muscle intracellular calcium concentration, little is known about subcellular mechanisms that are important during cerebral vasoconstriction from hypocapnia.

### Carbon Dioxide and Cerebral Vascular Regulation

Alteration of  $Pa_{CO_2}$  affects CBF and may interact with several physiologic or pathophysiologic processes in the brain. This section reviews (1) the effect of  $CO_2$  on CBF and cerebral blood volume (CBV), (2) the effect of anesthetics on the  $CO_2$  response of the cerebral circulation, (3) the potential interactions of  $CO_2$  with other processes that regulate CBF, and (4) the possibility for hypocapnia-induced cerebral ischemia in the normal brain.

#### *Carbon Dioxide and Cerebral Blood Flow*

The relative change in CBF during variations of  $Pa_{CO_2}$  depends on several factors, including baseline CBF, cerebral perfusion pressure, and anesthetic drugs. However, in a wide variety of subjects and conditions, most studies report a change in global CBF of 1–2  $ml \cdot 100 g^{-1} \cdot min^{-1}$  for each 1 mmHg change in  $Pa_{CO_2}$ .<sup>24,63–82</sup> Reducing  $Pa_{CO_2}$  to 20–25 mmHg decreases the global CBF by 40–50%, and further reductions of  $Pa_{CO_2}$  do not reduce CBF any further.<sup>83,84</sup> Increasing the  $Pa_{CO_2}$  to 80 mmHg or more produces a maximal increase in CBF of 100–200% in anesthetized animals.<sup>37,83</sup> In awake animals, however, increasing the  $Pa_{CO_2}$  to 80 mmHg increases CBF by six times, but one half of the increase in CBF is a result of endogenous catecholamine release and activation of neuronal metabolism.<sup>85</sup> This suggests that in awake subjects, severe hypercapnia may increase the flow by two mechanisms, with a direct effect of  $CO_2$  on cerebral blood vessels and an indirect effect by increasing brain metabolism and blood flow.

Brain blood flow is not homogeneous, and areas of the brain that receive more blood flow have a steeper flow response to changes in  $Pa_{CO_2}$ . For example, in cats with a baseline cortical blood flow of 86  $ml \cdot 100$

$g^{-1} \cdot min^{-1}$ , the slope of the  $CO_2$  response was a 1.7-ml change in CBF for each 1-mmHg change in  $Pa_{CO_2}$ . In contrast, spinal cord blood flow was 46  $ml \cdot 100 g^{-1} \cdot min^{-1}$  with a slope of 0.9.<sup>67</sup> Similar findings have been reported in animals<sup>68</sup> and humans.<sup>76</sup> The observation that baseline CBF influences the response of CBF to changes in  $Pa_{CO_2}$  also holds true when CBF is elevated artificially, as by inhalational anesthetics.

#### *Sustained Hypocapnia and Cerebral Blood Flow*

In awake humans, active hyperventilation to a  $Pa_{CO_2}$  of 16 mmHg initially reduced CBF by 40%, but during 4 h of sustained hypocapnia, CBF recovered to within 10% of baseline.<sup>86</sup> Similar findings have been demonstrated in goats<sup>87</sup> and piglets.<sup>88</sup> Recovery of CBF during sustained hypocapnia appears to be mediated by a reduction in CSF (and extracellular) bicarbonate concentration and correction of extracellular  $pH$  (fig. 2).<sup>89</sup> Glial cells appear to be important in the regulation of extracellular bicarbonate concentration because these cells contain large amounts of carbonic anhydrase, which can convert bicarbonate to  $CO_2$  and water.<sup>90</sup> Bicarbonate is the only buffer in extracellular brain fluid, and the reduction of bicarbonate concentration during sustained hypocapnia leads to a greater reduction in brain extracellular  $pH$  and a greater increase in CBF during any subsequent increase in  $CO_2$ . In support of this concept, after 6 h of sustained hypocapnia in awake goats, normocapnia caused marked cerebral hyperemia.<sup>87</sup> Chronic hypocapnia in awake rabbits reduces the bicarbonate concentration of CSF and enhances the dilation of cerebral vessels to hypercapnia.<sup>91</sup> Thus, in humans, acute termination of sustained hyperventilation could result in cerebral hyperemia and increased intracranial pressure (ICP). To avoid these events, termination of sustained hypocapnia is best accomplished by normalizing  $Pa_{CO_2}$  over a period of hours, which allows the brain to increase the extracellular bicarbonate concentration and buffer the change in extracellular  $pH$ .

#### *Sustained Hypercapnia and Cerebral Blood Flow*

In anesthetized dogs, CBF returned to baseline values during 6 h of sustained hypercapnia, accompanied by an increase in CSF bicarbonate concentration and partial correction of CSF  $pH$ .<sup>92</sup> In awake rabbits, chronic hypercapnia increased CSF bicarbonate concentration and attenuated the response of the cerebral circulation to further hypercapnia.<sup>91</sup> In unanesthetized animals, however, hypercapnia can increase brain catechol-



CO<sub>2</sub> AND THE CEREBRAL CIRCULATION

Fig. 2. The effect of prolonged hyperventilation on brain extracellular pH, the partial pressure of carbon dioxide (P<sub>CO<sub>2</sub></sub>), and bicarbonate concentration. These values are a composite from those available in the literature.<sup>86,87</sup> (A) Under normal conditions, brain P<sub>CO<sub>2</sub></sub> is slightly higher, and pH and bicarbonate are slightly lower than arterial values. (B) When acute hyperventilation is initiated, brain alkalosis results in cerebral vasoconstriction, reducing cerebral blood flow (CBF), cerebral blood volume (CBV), and intracranial pressure (ICP). (C) After 6–12 h of sustained hypocapnia, extracellular brain pH recovers nearly to baseline levels due to a reduction of bicarbonate. At this point, cerebral vascular tone has recovered to baseline, which restores CBF and CBV to baseline. The ICP may not increase if other compensatory changes have occurred during hyperventilation. (D) If hyperventilation is acutely terminated, marked brain extracellular acidosis occurs due to both elevations of the partial pressure of carbon dioxide and a reduction of bicarbonate, resulting in cerebral vasodilatation and increased CBF, CBV, and possibly ICP.

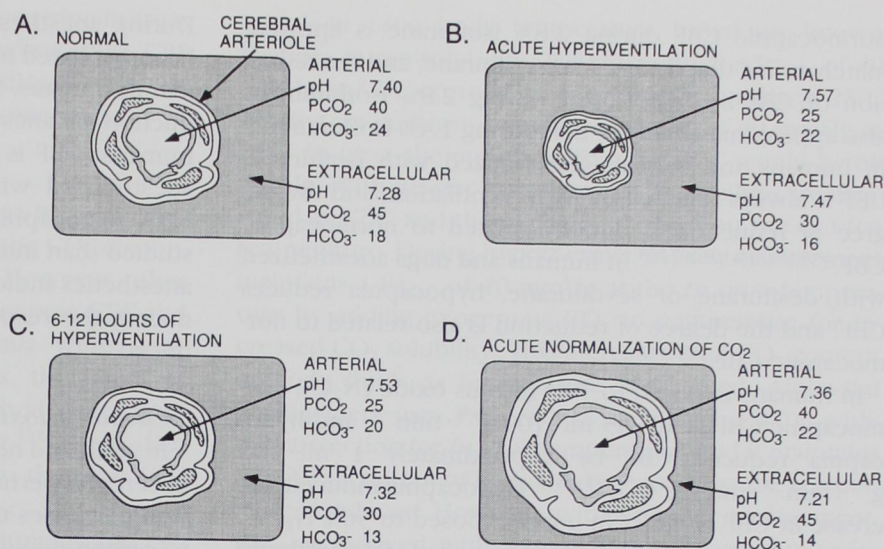

amines and activate cerebral metabolism, indirectly causing an increase in CBF.<sup>85,93</sup> Anesthetics may influence the response to hypercapnia by suppressing catecholamine release and preventing increased cerebral metabolism.

#### Carbon Dioxide and Cerebral Blood Volume

When hypocapnia is used to reduce ICP, it does so by reducing CBV and not CBF *per se*. Technical difficulties have limited the number of studies of Pa<sub>CO<sub>2</sub></sub> and CBV. Evidence indicates that during alterations of Pa<sub>CO<sub>2</sub></sub>, changes in CBV are qualitatively similar to changes in CBF. In humans, baseline CBV is 3 or 4 ml per 100 g<sup>94-96</sup> and is similar to values reported in baboons and monkeys when measurement techniques are similar.<sup>71,97</sup> Other investigators have reported that CBV was larger in monkeys, dogs, and goats<sup>78,98,99</sup> and smaller in rats.<sup>100</sup> In humans, hyperventilation reduces CBV by 0.049 ml · 100 g<sup>-1</sup> · mmHg CO<sub>2</sub><sup>-1</sup>,<sup>96</sup> which is similar to values in monkeys<sup>71</sup> and goats.<sup>78</sup> Smaller changes in CBV have been reported in rats<sup>100</sup> and dogs.<sup>99</sup> Variations in CBV measurements likely reflect the intrinsic difficulty of measuring CBV and the measurement techniques. During sustained hyperventilation in dogs, CBV returns to baseline during a period of 4 h.<sup>101</sup> The effect of Pa<sub>CO<sub>2</sub></sub> on CBV is attenuated during hypotension.<sup>98</sup>

#### Anesthetics, Carbon Dioxide, and Cerebral Blood Flow

**Inhaled Anesthetics.** In awake humans, hyperventilation decreased CBF by 0.9 ml · 100 g<sup>-1</sup> · min<sup>-1</sup> · mmHg CO<sub>2</sub><sup>-1</sup>, and during anesthesia with 1% halothane (and nitrous oxide), hyperventilation decreased CBF by 2 ml · 100 g<sup>-1</sup> · min<sup>-1</sup> · mmHg CO<sub>2</sub><sup>-1</sup>.<sup>81</sup> Although hyperventilation caused a greater reduction of CBF during anesthesia with halothane because halothane increased normocapnic CBF from 53 to 88 ml · 100 g<sup>-1</sup> · min<sup>-1</sup>, absolute CBF was greater during hyperventilation with halothane compared with hyperventilation in the awake state.<sup>81</sup> In halothane-anesthetized humans with a normocapnic CBF of 50 ml · 100 g<sup>-1</sup> · min<sup>-1</sup>, CBF was reduced by 1.4 ml for each 1 mmHg reduction in Pa<sub>CO<sub>2</sub></sub>.<sup>63</sup> In halothane-anesthetized animals, hyperventilation always reduces CBF, and the slope of the reduction is directly related to the normocapnic CBF.<sup>68,73,86,102-104</sup> These data indicate that the cerebral circulation responds to hyperventilation during halothane anesthesia, and the response is increased when normocapnic CBF is increased.

In humans, reductions in CBF by hyperventilation was greater during isoflurane anesthesia than in the awake state.<sup>105</sup> The importance of normocapnic CBF in determining the response to hyperventilation during isoflurane anesthesia was demonstrated in dogs, where



normocapnic CBF during 2.8% isoflurane is approximately twice that during 1.4% isoflurane, and the reduction of CBF by hypocapnia during 2.8% isoflurane is also approximately twice that during 1.4% isoflurane.<sup>106</sup> In humans and animals anesthetized with isoflurane, CBF is always reduced by hyperventilation, and the degree of reduction is directly related to normocapnic CBF.<sup>68,80,82,102,104,107,108</sup> In humans and dogs anesthetized with desflurane or sevoflurane, hypocapnia reduces CBF, and the degree of reduction is also related to normocapnic CBF.<sup>109-112</sup>

In humans exposed to 70% nitrous oxide ( $N_2O$ ), normocapnic CBF is  $40-45 \text{ ml} \cdot 100 \text{ g}^{-1} \cdot \text{min}^{-1}$ , and hypocapnia reduced CBF by approximately  $1 \text{ ml} \cdot 100 \text{ g}^{-1} \cdot \text{min}^{-1} \cdot \text{mmHg CO}_2^{-1}$ .<sup>69,72</sup> Hypocapnia-induced decrease in CBF is intact in goats exposed to 50%  $N_2O$ .<sup>78</sup> In humans, the addition of  $N_2O$  to a propofol anesthetic does not alter middle cerebral artery flow velocity or the response of the cerebral circulation to hypocapnia.<sup>113</sup> However, the addition of  $N_2O$  to a halothane anesthetic in rabbits increased normocapnic CBF and the slope of the response to hypocapnia.<sup>104</sup>

Several studies support the concept that by increasing normocapnic CBF, inhaled anesthetics enhance the response of the cerebral circulation to hypocapnia.<sup>68,102,105,106</sup> Although the slope of the response to hypocapnia can be increased by inhalational anesthetics, this does not mean that CBF can be reduced to lower absolute values during inhalational anesthesia (i.e., greater vasoconstriction produced). Increased normocapnic CBF during inhaled anesthetics results in greater absolute values in CBF during hypocapnia, despite the increased relative response to hypocapnia. During inhaled anesthesia when normocapnic CBF is comparable with the awake state, the reduction of CBF by hypocapnia is similar to that in the awake state.

**Intravenous Anesthetics.** During thiopental anesthesia in humans, hypocapnia reduces CBF, but as anesthetic depth increases and normocapnic CBF is reduced, the response of CBF to reduction of  $Pa_{CO_2}$  also decreases.<sup>69,114</sup> Similar findings have been reported for thiopental in baboons and dogs.<sup>115,116</sup> During anesthesia with propofol in humans, the cerebral circulation responds to hypocapnia and hypercapnia.<sup>66</sup> However, compared with the awake state in humans, propofol anesthesia reduces middle cerebral artery flow velocity and the hypocapnic reduction of flow velocity.<sup>113</sup> Further, the hypocapnia response of the cerebral circulation is less during deep levels of propofol anesthesia.<sup>117</sup>

During anesthesia with etomidate in humans, CBF is linearly related to  $Pa_{CO_2}$ .<sup>118</sup> During sedation with midazolam in humans, hypercapnia increases CBF.<sup>119</sup> After induction of anesthesia with fentanyl and diazepam in humans, CBF is linearly related to  $Pa_{CO_2}$ .<sup>120</sup> In animals anesthetized with either morphine or fentanyl with  $N_2O$ , hypocapnia reduces CBF.<sup>68,79</sup> Although less well studied than inhaled anesthetics, data with intravenous anesthetics indicate that when normocapnic CBF is reduced, the response of CBF to hypocapnia is also reduced.

### *Carbon Dioxide and Cerebral Autoregulation*

In adult and neonatal animals, a progressive reduction in cerebral perfusion pressure by hemorrhagic hypotension decreases the response of the cerebral circulation to carbon dioxide, and when perfusion pressure is less than the lower limits of cerebral autoregulation, the response to  $CO_2$  is abolished.<sup>121,122</sup> Other methods of producing hypotension generally yield a similar effect on the  $CO_2$  response of the cerebral circulation.<sup>74,75,103,108</sup> However, hypocapnia-induced reductions of CBF are present but attenuated during hypotension with isoflurane, in contrast to other hypotensive agents.<sup>74,108</sup> This may reflect the greater CBF during isoflurane, despite equal levels of hypotension. In these studies, CBF exceeded the value associated with rapid neuronal death ( $10 \text{ ml} \cdot 100 \text{ g}^{-1} \cdot \text{min}^{-1}$ ) during hypocapnia and normocapnia. Patients are rarely subjected to the profound degree of hypotension used in most of these studies and will likely maintain some response to hypocapnia during the lesser degree of hypotension used clinically. These studies suggest that in the normal brain, hypocapnia combined with hypotension does not reduce CBF to levels associated with cerebral injury.

Elevation of  $Pa_{CO_2}$  to 50–60 mmHg attenuates cerebral autoregulation, and elevation of  $Pa_{CO_2}$  to 70–90 mmHg abolishes autoregulation in primates and dogs.<sup>64,123</sup> The cerebral circulation adapts during chronic hypercapnia, with autoregulation returning toward normal over several days, despite continued elevation of the  $Pa_{CO_2}$  level.<sup>123</sup> In contrast, in primates and dogs, hypocapnia does not appear to alter autoregulation, although absolute CBF is reduced by hypocapnia.<sup>64,124</sup>

### *Carbon Dioxide Response in Neonates*

In sheep, the response of the cerebral circulation to  $Pa_{CO_2}$  increases during development from fetus to adult.<sup>125</sup> In newborn dogs, hypocapnia has a minimal



effect on CBF, with the greatest effect occurring in areas of the brain with more flow.<sup>126,127</sup> In newborn pigs, CBF is reduced only when PaCO<sub>2</sub> is <15 mmHg.<sup>128,129</sup> However, hypercapnia does increase CBF in neonates.<sup>127-130</sup>

#### *Carbon Dioxide Response in Aging*

Normocapnic gray matter blood flow has been reported to decrease during aging, as has the CO<sub>2</sub> responsiveness of gray matter blood flow.<sup>131,132</sup> However, other investigators have reported that normocapnic CBF and hypercapnia-induced cerebral hyperemia were unaltered with aging.<sup>133</sup> In awake humans, the effect of hypo- and hypercapnia on middle cerebral artery flow velocity was not different during aging.<sup>134</sup> These data indicate that if CBF declines with aging, then the CO<sub>2</sub> responsiveness of CBF will also decrease.

Some investigators have reported in humans and primates that atherosclerosis reduces hypercapnia-induced cerebral hyperemia.<sup>135,136</sup> However, others report that the response of the cerebral circulation to hypercapnia is normal in humans with atherosclerosis.<sup>137</sup> Occlusive atherosclerosis could limit the vasodilator reserve of the cerebral circulation by limiting maximal blood flow to the brain, thus reducing hypercapnia-induced hyperemia. Conflicting data may arise from the variable nature of atherosclerosis. Similar data assessing the effect of atherosclerosis on the response of the cerebral circulation to hypocapnia are not available.

#### *Carbon Dioxide Response and Hypertension*

It is generally accepted that chronic hypertension does not alter baseline CBF in either humans or animal models of hypertension. In hypertensive rats, baseline CBF and the reduction in CBF during hypocapnia are not different than in normotensive rats.<sup>138</sup> In humans with essential hypertension but without atherosclerosis, changes in CBF during hypocapnia and hypercapnia are similar to those in normotensive humans.<sup>70,139</sup>

#### *Carbon Dioxide Response and Hypothermia*

Brain temperature affects CBF and thus the response of the cerebral circulation to changes in PaCO<sub>2</sub>. An important issue in the study of temperature effects on CBF is the method by which PaCO<sub>2</sub> is managed. As blood is cooled anaerobically, PaCO<sub>2</sub> decreases due to the increased solubility of CO<sub>2</sub>, even though total CO<sub>2</sub> content remains constant. Blood gas tensions measure partial pressures of gas and are typically measured at 37°C. Gas tension measured at 37°C can be "corrected" to

actual *in vivo* body temperature based on known changes in gas solubility.<sup>140</sup> For example, a PaCO<sub>2</sub> of 40 mmHg at 37°C corrects to a PaCO<sub>2</sub> of 24 mmHg at 25°C *in vivo*. In contrast, to achieve a PaCO<sub>2</sub> of 40 mmHg at 25°C *in vivo*, the measured PaCO<sub>2</sub> at 37°C would be 68 mmHg. With pH-stat management, PaCO<sub>2</sub> values are measured at 37°C and then corrected based on the *in vivo* temperature. During hypothermia, pH-stat management maintains a PaCO<sub>2</sub> of 40 mmHg at the *in vivo* temperature by adding exogenous CO<sub>2</sub> to compensate for increased CO<sub>2</sub> solubility. This increases total CO<sub>2</sub> content of body fluids as temperature is reduced. Alpha-stat management uses PaCO<sub>2</sub> values measured at 37°C without correction for *in vivo* temperature, and it maintains total CO<sub>2</sub> content of body fluids constant as the temperature is reduced. However, with alpha-set management, PaCO<sub>2</sub> is reduced with reduced temperature due to increased CO<sub>2</sub> solubility. Thus pH-stat management results in relative hypercapnia at reduced body temperatures compared with alpha-stat management.

The cerebral circulation responds to changes in PaCO<sub>2</sub> during hypothermic cardiopulmonary bypass.<sup>141,142</sup> However, hypothermic cardiopulmonary bypass reduces CBF and the slope of the CBF/PaCO<sub>2</sub> relation.<sup>142</sup> During pH-stat blood gas management, CBF is greater than during alpha-stat management,<sup>143,144</sup> and autoregulation of CBF is attenuated compared with alpha-stat management.<sup>144,145</sup> This suggests that the relative hypercapnia of pH-stat management impairs cerebral autoregulation.

#### *Hypocapnia-induced Cerebral Ischemia in the Normal Brain*

In humans, when PaCO<sub>2</sub> is reduced to 20–25 mmHg, CBF is reduced to 20–25 ml·100 g<sup>-1</sup>·min<sup>-1</sup>.<sup>63,69,70,72</sup> However, CBF remains >20 ml·100 g<sup>-1</sup>·min<sup>-1</sup> even during extreme hypocapnia in anesthetized (PaCO<sub>2</sub> = 10 mmHg)<sup>72</sup> and nonanesthetized humans (PaCO<sub>2</sub> = 16 mmHg).<sup>86</sup> In animals, reducing PaCO<sub>2</sub> <20 mmHg does not reduce CBF further.<sup>71,121,138</sup> In nonanesthetized, normothermic humans and primates, the earliest signs and symptoms of cerebral ischemia such as confusion, inability to follow commands, focal neurologic deficits, and slowing of the electric activity of the brain, measured by an electroencephalogram (EEG), occur at global CBF levels of 20–30 ml·100 g<sup>-1</sup>·min<sup>-1</sup>.<sup>146,147</sup> However, CBF must be reduced to <10 ml·100 g<sup>-1</sup>·min<sup>-1</sup> to cause acute neuronal death.<sup>147</sup> Hyperventilation can reduce CBF to a level associated with mild



cerebral ischemia, and in humans and animals, reducing the  $\text{Pa}_{\text{CO}_2}$  to 20–25 mmHg slows the EEG<sup>148,149</sup> and impairs mental function,<sup>150,151</sup> which suggests the occurrence of mild cerebral ischemia. In addition to reducing CBF, marked alkalosis shifts the oxyhemoglobin dissociation curve to the left, further limiting oxygen delivery to the brain. Thus many investigators assume that hypocapnia-induced changes in EEG and mental activity result from cerebral ischemia.

A preliminary study in humans reported that hyperventilation-induced slowing of the EEG could be reversed by hyperbaric oxygen, which suggests that hyperventilation reduces oxygen delivery and limits cerebral metabolism.<sup>149</sup> Brain lactate concentration increases during severe hypocapnia and is inversely proportional to  $\text{Pa}_{\text{CO}_2}$ , which suggests insufficient oxygen to maintain oxidative metabolism.<sup>87,152–154</sup> Cortical oxygen tension is reduced during hypocapnia, and severe hypocapnia (10 mmHg  $\text{Pa}_{\text{CO}_2}$ ) can reduce cortical oxygen tension even while CBF remains constant, which suggests that increasing alkalosis further limits oxygen delivery.<sup>155,156</sup>

Although hyperventilation slows the EEG, hyperventilation-induced changes in the EEG may not represent cerebral ischemia. In humans, hypocapnia and hypoxia produce different changes in spectral power bands of the EEG.<sup>157</sup> Further, because hyperbaric oxygen can increase the frequency of the EEG, and cause seizures, it is not clear if reversal of hyperventilation-induced EEG changes represent a specific or nonspecific effect.<sup>158</sup> Brain lactate production is pH-dependent, and as pH increases, lactate production increases independent of oxygen availability.<sup>153,159</sup>

In animals and humans, hypocapnia to a  $\text{Pa}_{\text{CO}_2}$  10–20 mmHg does not change cerebral metabolic rate of oxygen use, which suggests that the brain is receiving sufficient oxygen to maintain oxidative metabolism.<sup>65,86,160,161</sup> Most,<sup>152–154</sup> but not all,<sup>162–164</sup> studies report that brain levels of high-energy compounds such as adenosine triphosphate (ATP) and phosphocreatine are unchanged during severe hypocapnia, which suggests that sufficient oxygen is reaching the brain to maintain oxidative phosphorylation. In newborn animals, cerebral metabolism is not impaired during severe hypocapnia ( $\text{Pa}_{\text{CO}_2} < 20$  mmHg),<sup>161</sup> and brain high energy stores are not reduced.<sup>126</sup>

Overall, these studies indicate that, in the normal brain, hypocapnia can reduce CBF to the threshold of cerebral ischemia, but not to CBF associated with

rapid neuronal death. If hypocapnia causes cerebral ischemia in the normal brain, it must be mild, and not associated with gross disturbances of brain oxidative metabolism. However, the long-term effect of hyperventilation on the normal brain are not known, because no data are available regarding hyperventilation-induced loss of neurons or permanent functional alterations.

### *Summary of Carbon Dioxide and Cerebral Vascular Regulation*

The cerebral circulation is very responsive to changes in  $\text{CO}_2$ ; at approximately 20–80 mmHg  $\text{Pa}_{\text{CO}_2}$ , CBF changes  $1–2 \text{ ml} \cdot 100 \text{ g}^{-1} \cdot \text{min}^{-1} \cdot \text{mmHg CO}_2^{-1}$  in many species under various conditions (table 1). The response of the cerebral circulation to changes in  $\text{Pa}_{\text{CO}_2}$  depends on resting CBF, and the slope of the response to  $\text{CO}_2$  increases as normocapnic CBF increases. At both extremes of  $\text{Pa}_{\text{CO}_2}$ , the response of the cerebral circulation is attenuated or abolished. During sustained alteration of  $\text{Pa}_{\text{CO}_2}$ , CBF recovers to baseline during a period of hours as brain extracellular pH corrects. During alterations in  $\text{Pa}_{\text{CO}_2}$ , CBV changes in parallel with changes in CBF, but the relative change is less marked. The cerebral circulation maintains its response to  $\text{CO}_2$  during administration of anesthetics, but the relative response of the cerebral circulation to change in  $\text{Pa}_{\text{CO}_2}$  may be altered if anesthetics alter normocapnic CBF. Hypotension to less than the lower limit of autoregulation can abolish the response of CBF to hypocapnia, and hypercapnia can attenuate or abolish cerebral autoregulation. The response of the cerebral circulation to  $\text{CO}_2$  increases during development from neonate to adult. However, aging does not alter the response to changes in  $\text{Pa}_{\text{CO}_2}$  as long as normocapnic CBF is unchanged. Hypertension does not affect the response of the cerebral circulation to  $\text{Pa}_{\text{CO}_2}$ , but atherosclerosis may limit hypercapnia-induced cerebral vasodilation. Hypothermia reduces CBF and the response of CBF to changes in  $\text{Pa}_{\text{CO}_2}$ . Many studies have tried to demonstrate hypocapnia-induced cerebral ischemia in the normal brain, but clear evidence for this is lacking.

### **Clinical Use of Hypocapnia and Hypercapnia**

Manipulation of  $\text{Pa}_{\text{CO}_2}$  is common in both the operating room and the intensive care unit, with hypocap-



CO<sub>2</sub> AND THE CEREBRAL CIRCULATIONTable 1. Summary of CO<sub>2</sub> and Cerebral Physiology

| Cerebral Blood Flow (CBF)                                                                                                                     | Cerebral Blood Volume (CBV)                                            | Cerebral Autoregulation                                                    | CO <sub>2</sub> Response and Anesthetics                                          | CO <sub>2</sub> Response and Disease/Injury                          |
|-----------------------------------------------------------------------------------------------------------------------------------------------|------------------------------------------------------------------------|----------------------------------------------------------------------------|-----------------------------------------------------------------------------------|----------------------------------------------------------------------|
| CBF changes 1–2 ml · 100 g <sup>-1</sup> · min <sup>-1</sup> for each 1 mmHg change in CO <sub>2</sub> between 20 and 80 mmHg CO <sub>2</sub> | CBV changes 0.05 ml/100 g for each 1 mmHg change in CO <sub>2</sub>    | Modest hypercapnia impairs and marked hypercapnia abolishes autoregulation | CO <sub>2</sub> response is maintained during inhaled and intravenous anesthetics | Hypercapnic response intact with hypertension                        |
| Slope of the response depends on normocapnic CBF                                                                                              | CBV returns to baseline during sustained alteration of CO <sub>2</sub> | Hypotension below the lower limit of autoregulation abolishes              | Relative response to hypocapnia depends on normocapnic CBF                        | Hypocapnic response present with brain injury, but may be attenuated |
| CBF returns to baseline during sustained alteration of CO <sub>2</sub>                                                                        |                                                                        | hypocapnic cerebral vasoconstriction                                       |                                                                                   |                                                                      |

nia being used to treat increased ICP and both hypocapnia and hypercapnia used to treat cerebral ischemia. This section reviews the clinical and experimental evidence regarding the manipulation of Pa<sub>CO<sub>2</sub></sub> in patient care.

#### Carbon Dioxide in the Management of Cerebral Ischemia

The pathophysiology and therapy of cerebral ischemia is complex and poorly understood, and a full overview of cerebral ischemia is beyond the scope of this review. In an attempt to enhance blood flow to ischemic brain, Pa<sub>CO<sub>2</sub></sub> has been manipulated during cerebral ischemia. However, manipulation of Pa<sub>CO<sub>2</sub></sub> affects not only CBF but also brain pH, which may affect cerebral ischemia independent of CBF.<sup>165</sup> Further, small variations in brain temperature can significantly affect the severity of a cerebral ischemic insult, and many studies did not adequately control brain temperature.<sup>166</sup> It is difficult to retrospectively assess the interactions of these factors during studies of Pa<sub>CO<sub>2</sub></sub> manipulation and cerebral ischemia. However, this section will focus on the effect of Pa<sub>CO<sub>2</sub></sub> manipulation on CBF during cerebral ischemia, and on how such changes in CBF may affect cerebral ischemia and patient care.

**Focal Cerebral Ischemia.** Cerebral embolization or occlusion of cerebral vessels results in focal cerebral ischemia. Hyperventilation is proposed to be beneficial during focal cerebral ischemia by constricting the non-ischemic brain and diverting blood flow to the ischemic brain (known as Robin Hood or inverse steal). This hypothesis assumes that the ischemic brain lacks hypo-

capnic-induced vasoconstriction. An early study in dogs reported that hyperventilation reduced the volume of brain infarction after middle cerebral artery occlusion, which suggests a favorable redistribution of blood flow by hyperventilation.<sup>167</sup> However, the same investigators<sup>168</sup> and others<sup>169</sup> later reported in cats and primates that hyperventilation did not reduce the volume of brain infarction after middle cerebral artery occlusion. In cats with middle cerebral artery occlusion, hyperventilation does not increase blood flow to the ischemic brain.<sup>77,170</sup> Furthermore, during focal cerebral ischemia in primates, hyperventilation exacerbated the reduction in brain high-energy compounds and impaired oxidative metabolism in the ischemic brain, which suggests that hyperventilation exacerbated cerebral ischemia.<sup>171,172</sup> In rats with middle cerebral artery occlusion, hyperventilation enlarges the area of the ischemic brain.<sup>107</sup> In humans who have had a stroke, CBF in the ischemic brain is low and can be further reduced by hyperventilation.<sup>173,174</sup> However, blood flow to the ischemic brain is increased in approximately 10% of patients who have had a stroke.<sup>174</sup> Hyperventilation of humans with acute, focal stroke does not alter patient outcome.<sup>175</sup>

Temporary focal cerebral ischemia may be induced in humans during carotid cross-clamping for endarterectomy. Hypocapnia during carotid cross-clamping does not reduce the incidence of new neurologic deficits after carotid endarterectomy, which suggests that CBF is not favorably redistributed by hypocapnia.<sup>176</sup> When CBF was measured during carotid cross-clamping in humans, hypocapnia decreased the CBF in the ischemic cerebral hemisphere in three of seven patients but in-



creased CBF in one of seven patients.<sup>177</sup> A case report also indicates that hypocapnia combined with hypertension was effective in reversing ischemic EEG changes during carotid cross-clamping.<sup>178</sup>

Thus, although an early animal study suggested that hyperventilation was beneficial during focal cerebral ischemia, other experimental studies indicate that hyperventilation is not beneficial and may be harmful by further reducing CBF in the ischemic brain. In humans with focal cerebral ischemia, hyperventilation appears to cause a favorable redistribution of CBF (inverse steal) in approximately 10% of patients. Assessment of whether hyperventilation is helpful or harmful in individual patients with focal cerebral ischemia requires measurement of CBF, cerebral function, or both. Furthermore, because of the transient effect of  $\text{Pa}_{\text{CO}_2}$  alterations on CBF, any enhancement of CBF will likely be temporary.

Hypercapnia has been proposed to be beneficial in focal ischemia by vasodilating the ischemic brain and increasing blood flow. Hypercapnia may also decrease blood flow to the ischemic brain by vasodilating the normal brain and diverting blood flow from the ischemic brain, which cannot be further dilated by hypercapnia (intracerebral steal). In animals with middle cerebral artery occlusion, hypercapnia does not change or decreases blood flow in the ischemic brain.<sup>77,170,179,180</sup> In animals with focal ischemia, hypercapnia does not dilate arteries in the ischemic brain cortex.<sup>77,181</sup> In humans who have had acute stroke, hypercapnia does not increase blood flow in the ischemic brain.<sup>182,183</sup> Several days after the onset of focal stroke in humans, the response of CBF to hypercapnia is more heterogeneous, with some patients demonstrating increased and others decreased flow in the ischemic brain.<sup>184</sup> However, in dogs with focal cerebral ischemia, modest hypercapnia increased blood flow in the ischemic brain and improved somatosensory evoked potentials.<sup>185</sup> The positive outcome of both hypercapnia and hypocapnia studies in dogs may reflect differences in the collateral cerebral circulation in dogs, which predisposes these animals to benefit from alterations of  $\text{Pa}_{\text{CO}_2}$ . Overall, however, data indicate that hypercapnia is not beneficial in focal cerebral ischemia.

**Global Ischemia.** Global cerebral ischemia occurs during cardiac arrest; after resuscitation, cerebral hyperfusion or hypoperfusion can occur. In an attempt to enhance CBF in the post-arrest state,  $\text{Pa}_{\text{CO}_2}$  has been manipulated. However, after global cerebral ischemia

in animals, the response of the cerebral circulation to hypocapnia is attenuated or abolished,<sup>130,186,187</sup> and the response to hypercapnia is markedly attenuated.<sup>130,187,188</sup> In newborn piglets, CBF can be reduced by hypocapnia, but hypercapnia does not increase CBF after global ischemia.<sup>130,189</sup> However, after global ischemia in juvenile pigs, the  $\text{CO}_2$  reactivity of the cerebral circulation is normal 2 h after ischemia.<sup>130</sup> In rabbits subjected to global cerebral ischemia, hypocapnia decreases the release of glutamate and glycine during ischemia, which suggests less severe neuronal damage.<sup>190</sup> After global cerebral ischemia in dogs, hypercapnia but not hypocapnia delayed electrophysiologic recovery,<sup>191</sup> which suggests that hypercapnia was detrimental. Also in dogs, hyperventilation improved the brain histopathology score after 15 min of cardiac arrest.<sup>192,193</sup> Thus, although some data suggest that hypocapnia can be beneficial after global ischemia, it is not possible to draw a definitive conclusion regarding potential benefits. Furthermore, most studies indicate that the response of the cerebral circulation to  $\text{CO}_2$  is markedly attenuated or abolished immediately after global cerebral ischemia. Similar data addressing manipulation of  $\text{Pa}_{\text{CO}_2}$  after cardiac arrest in humans are not available.

#### *Hyperventilation and Intracranial Pressure*

Hyperventilation is a common component in the management of increased ICP. Most evidence regarding hyperventilation in the management of increased ICP is derived from studies of head-injured patients. In the late 1960s and early 1970s, hyperventilation was proposed to decrease the mortality rate in patients after head injury.<sup>194-196</sup> However, these reports are difficult to interpret because often the  $\text{Pa}_{\text{CO}_2}$  was not measured. More importantly, the control patients in these studies breathed spontaneously with a native airway. Thus it is impossible to assess the degree of hyperventilation achieved and the contribution of airway maintenance and possible improved oxygenation on the outcomes of these studies.

During the late 1970s and 1980s, several authors reported that the mortality rate for head injury was reduced if a multimodal treatment approach was used that included hyperventilation.<sup>197,198</sup> However, other investigators<sup>199</sup> reported that mechanical ventilation did not affect outcome in patients with head injury. In 1991, a randomized, prospective trial of head injured patients reported that hyperventilation initially worsened outcome in a subset of patients, but by 1 yr after injury



there was no difference between hyperventilated and nonhyperventilated patients.<sup>200</sup> Due to inherent problems with this study, including hyperventilation of patients with normal ICP and relatively small differences in PaCO<sub>2</sub> between the hypocapnic and normocapnic groups, it is difficult to draw conclusions about the effect of hyperventilation on outcome in head injured patients.<sup>200</sup>

After head injury, CSF lactate concentration increases,<sup>201</sup> and hyperventilation has been proposed as beneficial by correcting brain acidosis.<sup>202</sup> However, in cats with severe fluid-percussion brain injury, brain intracellular pH decreases only transiently after injury,<sup>203</sup> and hyperventilation increases brain lactate production.<sup>204</sup> Thus brain intracellular acidosis appears limited after injury, and hyperventilation may exacerbate acidosis by increasing lactate production.

Cerebral blood flow can be low and ICP normal after head injury, especially in the first hours after injury.<sup>205</sup> Some authors have proposed that decreased CBF after head injury represents cerebral ischemia.<sup>205</sup> However, cerebral metabolism is also decreased after head injury, and the reduction in CBF may not represent cerebral ischemia but rather may reflect appropriate flow-metabolism coupling.<sup>206</sup> Because the cerebral circulation usually retains some responsiveness to CO<sub>2</sub> after head injury, hyperventilation can reduce CBF further.<sup>173, 206-208</sup> However, reduction in CBF alone is not sufficient to produce cerebral ischemia, because the threshold for ischemia depends not only on flow but also on metabolism. In some patients with head injury, hyperventilation reduces CBF, increases arteriovenous oxygen extraction, and reduces the cerebral metabolic rate of oxygen, which suggests the onset of cerebral ischemia.<sup>206</sup> In animals with ICP elevated to the threshold of cerebral ischemia, hyperventilation reduced brain phosphocreatine, which suggests cerebral ischemia.<sup>209</sup> Thus cerebral metabolic evidence suggests that after head injury, hyperventilation can reduce CBF to the point of cerebral ischemia.

Acute hyperventilation is effective in controlling increased ICP,<sup>210,211</sup> and in contrast to the studies just noted, hyperventilation can increase CBF by reducing ICP.<sup>212</sup> However, because hyperventilation has transient effects on CBF and CBV, it is only a temporary measure to control increased ICP.<sup>205</sup> Current recommendations for PaCO<sub>2</sub> management after brain injury discourage the use of prophylactic hyperventilation and suggest that

hyperventilation should be used only when increased ICP is refractory to other methods of control.<sup>205</sup>

Recent reports suggest that measurement of an objective parameter of cerebral oxygenation or CBF can assess the effect of hyperventilation on the brain metabolic state in head injured patients.<sup>213,214</sup> The ability to optimize cerebral perfusion would allow more rational treatment of individual patients. However, the methods proposed have not been evaluated prospectively, and their effect on patient outcome is unknown.

Based on clinical experience and experimental data, increased ICP can be reduced by acute hyperventilation. As ICP is reduced, cerebral perfusion pressure is increased and CBF may be increased. However, after head injury, despite the presence of coma, some patients may have reduced CBF and normal ICP. When ICP is normal, there is no benefit to hyperventilation, and there may be detriment by further reducing CBF. Prophylactic or indiscriminate use of hyperventilation in head injured patients should be avoided, and hyperventilation should be reserved for the acute treatment of increased ICP. Because the effect of hyperventilation on CBF, CBV, and ICP is transient, other interventions are necessary for long-term control of ICP.

#### *Hyperventilation and Subarachnoid Hemorrhage*

In primates, subarachnoid hemorrhage resulting in coma and hemiparesis does not alter the response of the cerebral circulation to hypocapnia, although the hypercapnia-induced increase in CBF was reduced by 50%.<sup>115</sup> In humans with subarachnoid hemorrhage, those with no or mild angiographic vasospasm have a normal response to hypocapnia.<sup>215</sup> However, in patients with severe vasospasm documented by angiography, CBF responded less to hyperventilation.<sup>215</sup> All patients in this study, including those with relatively low normocapnic CBF (<25 ml · 100 g<sup>-1</sup> · min<sup>-1</sup>), responded to hyperventilation, even though the response was attenuated in patients with low normocapnic CBF. In patients with severe cerebral vasospasm, attenuation of hypocapnia-induced cerebral vasoconstriction may be due to preexisting constriction from vasospasm.

#### *Intraoperative Hyperventilation*

Hyperventilation is considered an integral component of the anesthetic management of patients undergoing intracranial surgery. Hypocapnia is proposed to be beneficial by reducing CBV and ICP, thus allowing brain tissue to be retracted with less force, thereby enhancing



operative exposure. Hyperventilation was proposed as an adjunct to anesthetic management in intracranial operations in the late 1950s. Before then, most patients undergoing intracranial operations breathed spontaneously while they were anesthetized. Although it was recognized that hypercapnia increased CBV and ICP,<sup>216</sup> early discussions of anesthetic management of patients having neurosurgery do not mention controlled ventilation or hyperventilation.<sup>217,218</sup> In 1957, a subjective report detailed the use of intraoperative hyperventilation to improve intracranial operating conditions.<sup>219</sup> Later, when ICP and  $\text{Pa}_{\text{CO}_2}$  were measured in anesthetized patients having intracranial surgery,  $\text{Pa}_{\text{CO}_2}$  and ICP were frequently elevated ( $\text{Pa}_{\text{CO}_2} > 60$  mmHg) and "hyperventilation" only restored  $\text{Pa}_{\text{CO}_2}$  to normal levels.<sup>220</sup> Subsequent reports supported the use of intraoperative hyperventilation, but these reports are subjective rather than critical evaluations of the technique.<sup>221,222</sup> All of these reports compare spontaneous ventilation to hyperventilation, with hyperventilation usually defined based on delivered minute ventilation rather than measurement of  $\text{Pa}_{\text{CO}_2}$ .

In the early 1960s, hyperventilation of patients undergoing craniotomy was reported to reduce tension of the dura, as assessed in an unblinded fashion by surgeons.<sup>223,224</sup> However,  $\text{Pa}_{\text{CO}_2}$  was not measured, anesthetic agents were not standardized, and hyperventilation was compared with spontaneous ventilation.<sup>223,224</sup> These investigators also reported that in spontaneously breathing patients, osmotic dehydrating agents were as effective as hyperventilation in reducing dural tension.<sup>224</sup> Although these anecdotal reports do not indicate if hyperventilation resulted in hypocapnia or normocapnia, they began the tradition of hyperventilation for patients undergoing intracranial surgery.

By the mid-1960s, investigators reported that halothane could increase CBF and ICP.<sup>225,226</sup> Hyperventilation before administration of halothane was proposed as a method to attenuate halothane-induced increases in ICP.<sup>227,228</sup> Isoflurane was later reported to increase CBF and ICP,<sup>229,230</sup> and hyperventilation was again proposed as a method to offset isoflurane-induced increases in ICP.<sup>229</sup> In contrast to halothane, isoflurane-mediated elevations of ICP could be prevented when hyperventilation was instituted concomitantly with the administration of isoflurane.<sup>229,231</sup> In dogs, 2% isoflurane significantly increased CBV, and hyperventilation attenuated this effect.<sup>99</sup> However, in dogs with supratentorial space-occupying lesions, administration of isoflurane

after induction of hyperventilation does not increase ICP further.<sup>232</sup>

In humans undergoing craniotomy, the degree of hyperventilation required to prevent an inhaled anesthetic-induced increase in ICP appears to vary, which reflects individual variability in intrinsic mechanisms to compensate for increased CBV. In one study of patients with intracranial tumors, ICP was not different (12–15 mmHg) during modest hypocapnia ( $\text{Pa}_{\text{CO}_2} \approx 30$  mmHg) during anesthesia with either isoflurane with nitrous oxide or propofol with fentanyl.<sup>233</sup> However, other investigators reported in patients with intracranial tumors that isoflurane increased ICP from 14 to 22 mmHg despite hyperventilation to an end-tidal  $\text{CO}_2$  level of 26 mmHg.<sup>234</sup> In patients undergoing CSF shunt procedures, isoflurane increased ICP from 4 to 26 mmHg, and subsequent hyperventilation reduced ICP to 2 mmHg.<sup>231</sup> Although hyperventilation is commonly used in patients undergoing intracranial surgery, the effect of hyperventilation on patient outcome has not been evaluated objectively. Furthermore, the relative degree of hyperventilation required also has not been determined. Hyperventilation can reduce increased ICP and can offset the effect of inhaled anesthetics on ICP. However, due to the variable nature of intracranial disease, the degree of hyperventilation required in individual patients can only be assessed on an individual basis. The need for and degree of hyperventilation in patients should be guided by preoperative signs and symptoms of increased ICP, by inspection of intracranial contents during craniotomy, and by measurement of ICP.

#### *Summary of the Clinical Use of Hypocapnia and Hypercapnia*

During permanent focal cerebral ischemia, hyperventilation does not improve outcome in humans and can exacerbate cerebral ischemia in animals. In a minority of patients, hyperventilation can increase blood flow during temporary and permanent focal cerebral ischemia. Hypercapnia also does not appear to be beneficial with focal cerebral ischemia. Manipulation of  $\text{Pa}_{\text{CO}_2}$  after global ischemia has been studied less, and definite conclusions regarding the use of  $\text{Pa}_{\text{CO}_2}$  manipulation are not available. However, immediately after global ischemia, the response of the cerebral circulation to  $\text{CO}_2$  is attenuated or abolished. After head injury, acute hyperventilation can reduce increased ICP and increase cerebral perfusion. However, head injury can reduce CBF in humans, and hyperventilation can further reduce CBF. In



animals with elevated ICP, hyperventilation can reduce both CBF and brain energy stores. Although control of elevated ICP is an important goal after head injury, there is no objective evidence that hyperventilation improves outcome in patients with head injury. Current recommendations are to avoid prophylactic hyperventilation in brain injured patients and to reserve hyperventilation to treat increased ICP that cannot be controlled by other methods.

Intraoperative hyperventilation appears to be a clinically useful intervention to control ICP, to offset the effect of inhaled anesthetics, and to enhance operative exposure. However, intraoperative hyperventilation has not been evaluated rigorously, and the overall effect on patient outcome is unknown. The degree of intraoperative hyperventilation necessary in individual patients requires assessment of preoperative signs and symptoms of increased ICP, intraoperative inspection of intracranial contents, and measurement of ICP. Excessive or indiscriminate use of intraoperative hyperventilation may not be innocuous, because some evidence suggests that hyperventilation can further reduce CBF in the brain with low normocapnic blood flow.

## Conclusions

In the past 100 yr, a great deal has been learned regarding CO<sub>2</sub> and the cerebral circulation. Today much is known about the mechanisms of CO<sub>2</sub>-mediated changes in cerebral vascular tone. A key step in CO<sub>2</sub>-mediated signaling is alteration of extracellular brain pH. After alterations in pH, changes in intracellular calcium concentration are the final common mediator in both hypercapnia and hypocapnia. In adults animals, NO and cGMP contribute to modest but not marked hypercapnia-induced dilation of cerebral blood vessels. However, NO and cGMP may not be the direct vasodilators, but rather may function in a "permissive" role. In neonates, cyclo-oxygenase products and cAMP are important in hypercapnia-induced cerebral vasodilation, but they also may not be the direct vasodilators. Finally, activation of K<sub>ATP</sub> channels is important in cerebral vasodilation to modest hypercapnia in adults.

Between Pa<sub>CO<sub>2</sub></sub> values of 20 and 80 mmHg, CBF changes 1 to 2 ml · 100 g<sup>-1</sup> · min<sup>-1</sup> for each 1 mmHg change in Pa<sub>CO<sub>2</sub></sub>. The change in CBF is related to the normocapnic CBF, and when flow is increased, the relative response to hypocapnia is increased. During sus-

tained alterations of Pa<sub>CO<sub>2</sub></sub>, CBF returns to baseline over several hours due to a correction of brain extracellular pH. Anesthetics that increase CBF enhance the reduction of CBF by hypocapnia, and anesthetics that reduce CBF reduce the response. Cerebral blood volume changes in a manner that is similar to CBF, but the relative change is less marked. Hypotension less than the lower limit of autoregulation attenuates or abolishes the response of the cerebral circulation to changes in Pa<sub>CO<sub>2</sub></sub>. Hypercapnia can attenuate or abolish autoregulation. The response of CBF to changes in Pa<sub>CO<sub>2</sub></sub> increases during development from neonate to adult. However, during aging the response to hypocapnia does not change as long as normocapnic CBF is unchanged. Untreated hypertension does not affect the response of the cerebral circulation to changes in Pa<sub>CO<sub>2</sub></sub>. Hypothermia reduces normocapnic CBF and the response of CBF to changes in Pa<sub>CO<sub>2</sub></sub>. Many studies have tried to demonstrate hypocapnic-induced ischemia in the normal brain, but clear evidence for this is lacking.

During temporary focal cerebral ischemia, neither hypercapnia nor hypocapnia improve and in fact may worsen outcome. Hypocapnia has been reported to increase blood flow to the ischemic brain during temporary and permanent focal cerebral ischemia in a minority of patients. Animal data suggest that hyperventilation can improve some indicators of cerebral well-being after global cerebral ischemia. However, no data are available to assess the effect of hyperventilation after global ischemia in humans. When ICP is increased, acute hyperventilation can reduce ICP and may increase CBF. However, the effect of hyperventilation on patient outcome is uncertain. Current recommendations are to reserve hyperventilation for the treatment of increased ICP that cannot be controlled by other methods. After subarachnoid hemorrhage, the cerebral circulation responds to reductions in Pa<sub>CO<sub>2</sub></sub>, although the response may be attenuated if vasospasm is present. Intraoperative hyperventilation appears to be useful in controlling ICP, offsetting the effect of inhaled anesthetics, and improving intracranial operating conditions. However, objective data on intraoperative hyperventilation and operative exposure or patient outcome are lacking. In the clinical care of patients in the operating room, the need for and degree of hyperventilation can be guided only by assessment of the signs and symptoms of increased ICP, inspection of intracranial contents during craniotomy, and measurement of ICP. As in the inten-



sive care unit, it would be prudent to avoid unnecessary hyperventilation in the operating room.

The author thanks Drs. Bradley J. Hindman, Frank M. Faraci, and Costantino Iadecola for helpful suggestions.

## References

1. You JP, Wang Q, Zhang W, Jansen-Olesen I, Paulson OB, Lassen NA, Edvinsson L: Hypercapnic vasodilatation in isolated rat basilar arteries is exerted via low pH and does not involve nitric oxide synthase stimulation or cyclic GMP production. *Acta Physiol Scand* 1994; 152:391-7
2. Dietrich HH, Dacey RG Jr: Effects of extravascular acidification and extravascular alkalization on constriction and depolarization in rat cerebral arterioles *in vitro*. *J Neurosurg* 1994; 81:437-42
3. Kontos HA, Wei EP, Raper AJ, Patterson JL Jr: Local mechanism of CO<sub>2</sub> action on cat pial arterioles. *Stroke* 1977; 8:226-9
4. Wahl M, Deetjen P, Thurau K, Ingvar DH, Lassen NA: Micro-puncture evaluation of the importance of perivascular pH for the arteriolar diameter on the brain surface. *Pflügers Arch* 1970; 316:152-63
5. Betz E, Enzenroß HG, Vlahov V: Interaction of H<sup>+</sup> and Ca<sup>++</sup> in the regulation of local pial vascular resistance. *Pflügers Arch* 1973; 343:79-88
6. Wang Q, Pelligrino D, Koenig HM, Albrecht RF: The role of endothelium and nitric oxide in rat pial arteriolar dilatory responses to CO<sub>2</sub> *in vivo*. *J Cereb Blood Flow Metab* 1994; 14:944-51
7. Leffler CW, Fedinec AL, Shibata M: Prostacyclin receptor activation and pial arteriolar dilation after endothelial injury in piglets. *Stroke* 1995; 26:2103-11
8. Leffler CW, Mirro R, Shanklin DR, Armstead WM, Shibata M: Light/dye microvascular injury selectively eliminates hypercapnia-induced pial arteriolar dilation in newborn pigs. *Am J Physiol* 1994; 266:H623-30
9. Iadecola C, Zhang F: Permissive and obligatory roles of NO in cerebrovascular responses to hypercapnia and acetylcholine. *Am J Physiol* 1996; 271:R990-R1001
10. Iadecola C, Arneric SP, Baker HD, Tucker LW, Reis DJ: Role of local neurons in cerebrocortical vasodilation elicited from cerebellum. *Am J Physiol* 1987; 252:R1082-91
11. Severinghaus JW, Chiodi H, Eger EI II, Brandstater B, Hornbein TF: Cerebral blood flow in man at high altitude: Role of cerebrospinal fluid pH in normalization of flow in chronic hypocapnia. *Circ Res* 1966; 19:274-82
12. Kontos HA, Raper J, Patterson JL Jr: Analysis of vasoactivity of local pH, P<sub>CO<sub>2</sub></sub> and bicarbonate on pial vessels. *Stroke* 1977; 8:358-60
13. Tian R, Vogel P, Lassen NA, Mulvany MJ, Andreassen F, Aalkjær C: Role of extracellular and intracellular acidosis for hypercapnia-induced inhibition of tension of isolated rat cerebral arteries. *Circ Res* 1995; 76:269-75
14. Wray S: Smooth muscle intracellular pH: Measurement, regulation and function. *Am J Physiol* 1988; 254:C213-25
15. Hsu P, Shibata M, Leffler CW: Prostanoid synthesis in response to high CO<sub>2</sub> in newborn pig brain microvascular endothelial cells. *Am J Physiol* 1993; 264:H1485-92
16. Eriksson S, Hagenfeldt L, Law D, Patrono C, Pinca E, Wennmalm Å: Effect of prostaglandin synthesis inhibitors on basal and carbon dioxide stimulated cerebral blood flow in man. *Acta Physiol Scand* 1983; 117:203-11
17. Iadecola C, Zhang F, Xu X: SIN-1 reverses attenuation of hypercapnic cerebrovasodilation by nitric oxide synthase inhibitors. *Am J Physiol* 1994; 267:R228-35
18. Wang Q, Paulson OB, Lassen NA: Indomethacin abolishes cerebral blood flow increase in response to acetazolamide-induced extracellular acidosis: A mechanisms for its effect on hypercapnia? *J Cereb Blood Flow Metab* 1993; 13:724-7
19. Markus HS, Vallance P, Brown MM: Differential effect of three cyclooxygenase inhibitors on human cerebral blood flow velocity and carbon dioxide reactivity. *Stroke* 1994; 25:1760-4
20. Wei EP, Ellis EF, Kontos HA: Role of prostaglandins in pial arteriolar response to CO<sub>2</sub> and hypoxia. *Am J Physiol* 1980; 238:H226-30
21. Busija DW, Heistad DD: Effects of indomethacin on cerebral blood flow during hypercapnia in cats. *Am J Physiol* 1983; 244:H519-24
22. Toda N, Ayajiki K, Enokibori M, Okamura T: Monkey cerebral arterial relaxation caused by hypercapnic acidosis and hypertonic bicarbonate. *Am J Physiol* 1993; 265:H929-33
23. Busija DW: Role of prostaglandins in the response of the cerebral circulation to carbon dioxide in conscious rabbits. *J Cereb Blood Flow Metab* 1983; 3:376-80
24. Pickard JD, Rose JE, Cooke MBD, Blair IM, Strathdee A: The effect of salicylate on cerebral blood flow in man. *Acta Neurol Scand* 1977; 64(suppl):422-3
25. Quintana A, Raczka E, Quintana MA: Effects of indomethacin and diclofenac on cerebral blood flow in hypercapnic conscious rats. *Eur J Pharmacol* 1988; 149:385-8
26. Ellis EF, Wei EP, Cockrell CS, Traweck DL, Saady JJ, Kontos HA: The effect of O<sub>2</sub> and CO<sub>2</sub> on prostaglandin levels in the cat cerebral cortex. *Circ Res* 1982; 51:652-6
27. Jackson EK, Gerkens JF, Zimmerman JB, Uderman HD, Oates JA, Workman RJ, Branch RA: Prostaglandin biosynthesis does not participate in hypercapnia-induced cerebral vasodilation in the dog. *J Pharmacol Exp Ther* 1983; 226:486-92
28. McCalden TA, Nath RG, Thiele K: The role of prostacyclin in the hypercapnic and hypoxic cerebrovascular dilations. *Life Sci* 1984; 34:1801-7
29. Armstead WM, Zuckerman SL, Shibata M, Parfenova H, Leffler CW: Differential pial arteriolar responses to acetylcholine in the newborn and juvenile pig. *J Cereb Blood Flow Metab* 1994; 14:1088-95
30. Wagerle LC, Mishra OP: Mechanism of CO<sub>2</sub> response in cerebral arteries of the newborn pig: Role of phospholipase, cyclooxygenase, and lipoxygenase pathways. *Circ Res* 1988; 62:1019-26
31. Leffler CW, Busija DW: Prostanoids in cortical subarachnoid cerebrospinal fluid and pial arterial diameter in newborn pigs. *Circ Res* 1985; 57:689-94
32. Parfenova H, Shibata M, Zuckerman S, Leffler CW: CO<sub>2</sub> and cerebral circulation in newborn pigs: cyclic nucleotides and prostanoids in vascular regulation. *Am J Physiol* 1994; 266:H1494-501



CO<sub>2</sub> AND THE CEREBRAL CIRCULATION

33. Edwards AD, Wyatt JS, Richardson C, Potter A, Cope M, Delpy DT, Reynolds EOR: Effects of indomethacin on cerebral haemodynamics in very preterm infants. *Lancet* 1990; 335:1491-5
34. Wagerle LC, Degiulio PA: Indomethacin-sensitive CO<sub>2</sub> reactivity of cerebral arterioles is restored by vasodilator prostaglandin. *Am J Physiol* 1994; 266:H1332-8
35. Iadecola C, Pelligrino DA, Moskowitz MA, Lassen NA: Nitric oxide synthase inhibition and cerebrovascular regulation. *J Cereb Blood Flow Metab* 1994; 14:175-92
36. Faraci FM, Brian JE Jr: Nitric oxide in the cerebral circulation. *Stroke* 1994; 25:692-703
37. Iadecola C, Zhang F: Nitric oxide-dependent and -independent components of cerebrovasodilation elicited by hypercapnia. *Am J Physiol* 1994; 266:R546-52
38. Wang Q, Paulson OB, Lassen NA: Effect of nitric oxide blockade by N<sup>G</sup>-nitro-L-arginine on cerebral blood flow response to changes in carbon dioxide tension. *J Cereb Blood Flow Metab* 1992; 12:947-53
39. Niwa K, Lindner U, Villringer A, Dirnagl U: Blockade of nitric oxide synthesis in rats strongly attenuates the CBF response to extracellular acidosis. *J Cereb Blood Flow Metab* 1993; 13:535-9
40. Irikura I, Maynard KI, Lee WS, Moskowitz MA: L-NNA decreases cortical hyperemia and brain cGMP levels following CO<sub>2</sub> inhalation in Sprague-Dawley rats. *Am J Physiol* 1994; 267:H837-43
41. Faraci FM, Breese KR, Heistad DD: Cerebral vasodilatation during hypercapnia: Role of glibenclamide-sensitive potassium channels and nitric oxide. *Stroke* 1994; 25:1679-83
42. Dreier JP, Körner K, Görner A, Lindauer U, Weih M, Villringer A, Dirnagl U: Nitric oxide modulates the CBF response to increased extracellular potassium. *J Cereb Blood Flow Metab* 1995; 15:914-9
43. Smith JJ, Hudetz AG, Boznjak ZJ, Kampine JP: The role of nitric oxide in cerebrocortical laser doppler flow response to halothane in the rat. *J Neurosurg Anesthesiol* 1995; 7:187-95
44. Togashi H, Sasaki M, Frohman E, Taira E, Ratan R, Dawson TM, Dawson VL: Neuronal (type I) nitric oxide synthase regulates nuclear factor  $\kappa$ B activity and immunologic (type II) nitric oxide synthase expression. *Proc Natl Acad Sci U S A* 1997; 94:2676-80
45. Bredt DS, Hwang PM, Snyder SH: Localization of nitric oxide synthase indicating a neural role for nitric oxide. *Nature* 1990; 347:768-70
46. Toda N, Okamura T: Nitroxidergic nerve: Regulation of vascular tone and blood flow in the brain. *J Hypertens* 1996; 14:423-34
47. Zhang F, Xu S, Iadecola C: Role of nitric oxide and acetylcholine in neocortical hyperemia elicited by basal forebrain stimulation: Evidence for an involvement of endothelial nitric oxide. *Neuroscience* 1995; 69:1195-204
48. Iadecola C, Zhang F, Xu X: Role of nitric oxide synthase-containing vascular nerves in cerebrovasodilatation elicited from cerebellum. *Am J Physiol* 1993; 264:R738-46
49. Faraci FM, Heistad DD: Endothelium-derived relaxing factor inhibits constrictor responses of large cerebral arteries to serotonin. *J Cereb Blood Flow Metab* 1992; 12:500-6
50. Kitazono T, Faraci FM, Taguchi H, Heistad DD: Role of potassium channels in cerebral blood vessels. *Stroke* 1995; 26:1713-23
51. Davies NW: Modulation of ATP-sensitive K<sup>+</sup> channels in skeletal muscle by intracellular protons. *Nature* 1990; 343:375-7
52. Kinoshita H, Katusic ZS: Role of potassium channels in relaxations of isolated canine basilar arteries to acidosis. *Stroke* 1997; 28:433-8
53. Kontos HA, Wei EP: Arginine analogues inhibit responses mediated by ATP-sensitive K<sup>+</sup> channels. *Am J Physiol* 1996; 271:H1498-506
54. Lincoln TM, Komalavilas P, Cornwell TL: Pleiotropic regulation of vascular smooth muscle tone by cyclic GMP-dependent protein kinase. *Hypertension* 1994; 23(part 2):1141-7
55. Bolotina VM, Najibi S, Palacino JJ, Pagano PJ, Cohen RA: Nitric oxide directly activates calcium-dependent potassium channels in vascular smooth muscle. *Nature* 1994; 368:850-3
56. Paternò R, Faraci FM, Heistad DD: Role of Ca<sup>2+</sup>-dependent K<sup>+</sup> channels in cerebral vasodilatation induced by increases in cyclic GMP and cyclic AMP in the rat. *Stroke* 1996; 27:1603-8
57. Sobey CG, Faraci FM: Effect of nitric oxide and potassium channel agonists and inhibitors on basilar artery diameter. *Am J Physiol* 1997; 272:H256-62
58. Bonnet P, Rusch NJ, Harder DR: Characterization of an outward K<sup>+</sup> current in freshly dispersed cerebral arterial muscle cells. *Pflügers Arch* 1991; 418:292-6
59. Dietrich HH, Kimura M, Dacey RG Jr: N<sup>G</sup>-nitro-L-arginine constricts cerebral arterioles without increasing intracellular calcium levels. *Am J Physiol* 1994; 266:H1681-6
60. Austin C, Wray S: The effects of extracellular pH and calcium change on force and intracellular calcium in rat vascular smooth muscle. *J Physiol* 1995; 488:281-91
61. Sperelakis N, Xiong Z, Haddad G, Masuda H: Regulation of slow calcium channels of myocardial cells and vascular smooth muscle cells by cyclic nucleotides and phosphorylation. *Mol Cell Biochem* 1994; 140:103-17
62. Chen X-L, Rembold CM: Cyclic nucleotide-dependent regulation of Mn<sup>2+</sup> influx, [Ca<sup>2+</sup>]<sub>i</sub>, and arterial smooth muscle relaxation. *Am J Physiol* 1992; 263:C468-73
63. Alexander SC, Wollman H, Cohen PJ, Chase PE, Behar M: Cerebrovascular response to PaCO<sub>2</sub> during halothane anesthesia in man. *J Appl Physiol* 1964; 19:561-5
64. Häggendal E, Johansson B: Effects of arterial carbon dioxide tension and oxygen saturation on cerebral blood flow autoregulation in dogs. *Acta Physiol Scand* 1965; 66(suppl 258):27-53
65. Alberti E, Hoyer S, Hamer J, Stoeckel H, Packschiess P, Weinhardt F: The effect of carbon dioxide on cerebral blood flow and cerebral metabolism in dogs. *Br J Anaesth* 1975; 47:941-7
66. Fox J, Gelb AW, Enns J, Murkin JM, Farrar JK, Manninen PH: The responsiveness of cerebral blood flow to changes in arterial carbon dioxide is maintained during propofol-nitrous oxide anesthesia in humans. *ANESTHESIOLOGY* 1992; 77:453-6
67. Sato M, Pawlik G, Heiss W-D: Comparative studies of regional CNS blood flow autoregulation and responses to CO<sub>2</sub> in the cat. *Stroke* 1984; 15:91-7
68. Scheller MS, Todd MM, Drummond JC: Isoflurane, halothane, and regional cerebral blood flow at various levels of PaCO<sub>2</sub> in rabbits. *ANESTHESIOLOGY* 1986; 64:598-604
69. Wollman H, Alexander SC, Cohen PJ, Smith TC, Chase PE,



- van der Molen RA: Cerebral circulation during general anesthesia and hyperventilation in man. *ANESTHESIOLOGY* 1965; 26:329-34
70. Tominga S, Strandgaard S, Uemura K, Ito K, Kitsuzawa T, Lassen NA, Nakemura T: Cerebrovascular CO<sub>2</sub> reactivity in normotensive and hypertensive man. *Stroke* 1976; 7:507-10
71. Grubb RL Jr, Raichle ME, Eichling JO, Ter-Pogossian MM: The effects of changes in Pa<sub>CO<sub>2</sub></sub> on cerebral blood volume, blood flow, and vascular mean transit time. *Stroke* 1974; 5:630-9
72. Wollman H, Smith TC, Stephen GW, Colton ET III, Gleaton HE, Alexander C: Effects of extremes of respiratory and metabolic alkalosis on cerebral blood flow in man. *J Appl Physiol* 1968; 24:60-5
73. Young WL, Barkai AI, Prohovnik I, Nelson H, Durkin M: Effect of Pa<sub>CO<sub>2</sub></sub> on cerebral blood flow distribution during halothane compared with isoflurane anaesthesia in the rat. *Br J Anaesth* 1991; 67:440-6
74. Artru AA: Partial preservation of cerebral vascular responsiveness to hypocapnia during isoflurane-induced hypotension in dogs. *Anesth Analg* 1986; 65:660-6
75. Artru AA: Cerebral vascular responses to hypocapnia during nitroglycerin-induced hypotension. *Neurosurgery* 1985; 16:468-72
76. Wilkinson IMS, Browne DRG: The influence of anaesthesia and of arterial hypocapnia on regional blood flow in the normal human cerebral hemisphere. *Br J Anaesth* 1970; 42:472-82
77. Waltz AG: Effect of Pa<sub>CO<sub>2</sub></sub> on blood flow and microvasculature of ischemic and nonischemic cerebral cortex. *Stroke* 1970; 1:27-37
78. Smith AL, Neufeld GR, Ominsky AJ, Wollman H: Effect of arterial CO<sub>2</sub> tension on cerebral blood flow, mean transit time, and vascular biology. *J Appl Physiol* 1971; 31:701-7
79. Akesson J, Messeter K, Rosén I, Björkman S: Cerebral haemodynamic and electrocortical CO<sub>2</sub> reactivity in pigs anaesthetized with fentanyl, nitrous oxide and pancuronium. *Acta Anaesthesiol Scand* 1993; 37:85-91
80. Young WL, Prohovnik I, Correll JW, Ostapovich N, Ornstein E, Matteo RS, Baker KZ: A comparison of the cerebral hemodynamic effects of sufentanil and isoflurane in humans undergoing carotid endarterectomy. *ANESTHESIOLOGY* 1989; 71:863-9
81. McHenry LC, Slocum HC, Bivens HE, Mayes HA, Hayes GJ: Hyperventilation in awake and anesthetized man. *Arch Neurol* 1965; 12:270-7
82. Young WL, Prohovnik I, Correll JW, Ostapovich N, Ornstein E, Quest DO: A comparison of cerebral blood flow reactivity to CO<sub>2</sub> during halothane versus isoflurane anesthesia for carotid endarterectomy. *Anesth Analg* 1991; 73:416-21
83. Reivich M: Arterial P<sub>CO<sub>2</sub></sub> and cerebral hemodynamics. *Am J Physiol* 1964; 206:25-35
84. Alexander SC, Smith TC, Strobel G, Stephen GW, Wollman H: Cerebral carbohydrate metabolism of man during respiratory and metabolic alkalosis. *J Appl Physiol* 1968; 24:66-72
85. Berntman L, Dahlgren N, Siesjö BK: Cerebral blood flow and oxygen consumption in the rat brain during extreme hypercarbia. *ANESTHESIOLOGY* 1979; 50:299-305
86. Raichle ME, Posner JB, Plum F: Cerebral blood flow during and after hyperventilation. *Arch Neurol* 1970; 23:394-403
87. Albrecht RF, Miletich DJ, Ruttle M: Cerebral effects of extended hyperventilation in unanesthetized goats. *Stroke* 1987; 18:649-55
88. Hansen NB, Nowicki PT, Miller RR, Malone T, Bickers RG, Menke JA: Alterations in cerebral blood flow and oxygen consumption during prolonged hypocarbia. *Pediatr Res* 1986; 20:147-50
89. Muizelaar JP, van der Poel HG, Li Z, Kontos HA, Levasseur JE: Pial arteriolar vessel diameter and CO<sub>2</sub> reactivity during prolonged hyperventilation in the rabbit. *J Neurosurg* 1988; 69:923-7
90. Snyder DS, Zimmerman TR Jr, Farooq M, Norton WT, Cammer W: Carbonic anhydrase, 5'-nucleotidase, and 2',3'-cyclic nucleotide-3'-phosphodiesterase activities in oligodendrocytes, astrocytes, and neurons isolated from the brains of developing rats. *J Neurochem* 1983; 40:120-7
91. Levasseur JE, Wei EP, Kontos HA, Patterson JL Jr: Responses of pial arterioles after prolonged hypercapnia and hypoxia in the awake rabbit. *J Appl Physiol* 1979; 46:89-95
92. Warner DS, Turner DM, Kassell NF: Time-dependent effects of prolonged hypercapnia on cerebrovascular parameters in dogs: Acid-base chemistry. *Stroke* 1987; 18:142-9
93. Yang S-P, Krasney JA: Cerebral blood flow and metabolic responses to sustained hypercapnia in awake sheep. *J Cereb Blood Flow Metab* 1995; 15:115-23
94. Grubb RL Jr, Phelps ME, Ter-Pogossian MM: Regional cerebral blood volume in humans. *Arch Neurol* 1973; 28:38-44
95. Martin WRW, Powers WJ, Raichle ME: Cerebral blood volume measured with inhaled C<sup>15</sup>O and positron emission tomography. *J Cereb Blood Flow Metab* 1987; 7:421-6
96. Greenberg JH, Alavi A, Reivich M, Kuhl D, Uzzell B: Local cerebral blood volume response to carbon dioxide in man. *Circ Res* 1978; 43:324-31
97. Archer DP, Labrecque P, Tyler JL, Meyer E, Evans AC, Villemure JG, Casey WF, Diksic M, Hakim AM, Trop D: Measurement of cerebral blood flow and volume with positron emission tomography during isoflurane administration in the hypocapnic baboon. *ANESTHESIOLOGY* 1990; 72:1031-7
98. Phelps ME, Grubb RL Jr, Ter-Pogossian MM: Correlation between Pa<sub>CO<sub>2</sub></sub> and regional cerebral blood volume by X-ray fluorescence. *J Appl Physiol* 1973; 35:274-80
99. Archer DP, Labrecque P, Tyler JL, Meyer E, Trop D: Cerebral blood volume is increased in dogs during administration of nitrous oxide or isoflurane. *ANESTHESIOLOGY* 1987; 67:642-8
100. Todd MM, Weeks JB, Warner DS: Microwave fixation for the determination of cerebral blood volume in rats. *J Cereb Blood Flow Metab* 1993; 13:328-36
101. Artru AA: Reduction of cerebrospinal fluid pressure by hypocapnia: Changes in cerebral blood volume, cerebrospinal fluid volume, and brain tissue water and electrolytes. *J Cereb Blood Flow Metab* 1987; 7:471-9
102. Drummond JC, Todd MM: The response of the feline cerebral circulation to Pa<sub>CO<sub>2</sub></sub> during anesthesia with isoflurane and halothane and during sedation with nitrous oxide. *ANESTHESIOLOGY* 1985; 62:268-73
103. Gregory P, Ishikawa T, McDowall DG: CO<sub>2</sub> responses of the cerebral circulation during drug-induced hypotension in the cat. *J Cereb Blood Flow Metab* 1981; 1:195-201
104. Kaieda R, Todd MM, Warner DS: The effects of anesthetics and Pa<sub>CO<sub>2</sub></sub> on the cerebrovascular, metabolic and electroencephalo-



- graphic responses to nitrous oxide in the rabbit. *Anesth Analg* 1989; 68:135-43
105. Strebel S, Kaufmann M, Baggi M, Zenklusen U: Cerebrovascular carbon dioxide reactivity during exposure to equipotent isoflurane and isoflurane in nitrous oxide anaesthesia. *Br J Anaesth* 1993; 71:272-6
  106. McPherson RW, Brian JE Jr, Traystman RJ: Cerebrovascular responsiveness to carbon dioxide in dogs with 1.4% and 2.8% isoflurane. *ANESTHESIOLOGY* 1989; 70:843-50
  107. Ruta TS, Drummond JC, Cole DJ: The effect of acute hypoxia on local cerebral blood flow during middle cerebral artery occlusion in isoflurane anesthetized rats. *ANESTHESIOLOGY* 1993; 78:134-40
  108. Matta BF, Lam AM, Mayberg TS, Eng CC, Strebel S: Cerebrovascular response to carbon dioxide during sodium nitroprusside- and isoflurane-induced hypotension. *Br J Anaesth* 1995; 74:296-300
  109. Ornstein E, Young WL, Fleischer LH, Ostapovich N: Desflurane and isoflurane have similar effects on cerebral blood flow in patients with intracranial mass lesions. *ANESTHESIOLOGY* 1993; 79:498-502
  110. Lutz LJ, Milde JH, Milde LN: The response of the canine cerebral circulation to hyperventilation during anesthesia with desflurane. *ANESTHESIOLOGY* 1991; 74:504-7
  111. Kitaguchi K, Ohsumi H, Kuro M, Nakajima T, Hayashi Y: Effects of sevoflurane on cerebral circulation and metabolism in patients with ischemic cerebrovascular disease. *ANESTHESIOLOGY* 1993; 79:704-9
  112. Cho S, Kujigaki T, Uchiyama Y, Fukusai M, Shibata O, Somikawa K: Effects of sevoflurane with and without nitrous oxide on human cerebral circulation. *ANESTHESIOLOGY* 1996; 85:755-60
  113. Eng C, Lam AM, Mayberg TS, Lee C, Mathisen T: The influence of propofol with and without nitrous oxide on cerebral blood flow velocity and CO<sub>2</sub> reactivity in humans. *ANESTHESIOLOGY* 1992; 77:872-9
  114. Pearce EC Jr, Lambertsen CJ, Deutsch S, Chase PE, Linde HW, Dripps RD, Price HL: Cerebral circulation and metabolism during thiopental anesthesia and hyperventilation in man. *J Clin Invest* 1962; 41:1664-71
  115. Mendelow AD, McCalden TA, Hattingh J, Coull A, Rosendorff C, Eidelman BH: Cerebrovascular reactivity and metabolism after subarachnoid hemorrhage in baboons. *Stroke* 1981; 12:58-65
  116. Kassell NF, Hitchon PW, Gerck MK, Sokoll MD, Hill TR: Influence of changes in arterial P<sub>CO<sub>2</sub></sub> on cerebral blood flow and metabolism during high-dose barbiturate therapy in dogs. *J Neurosurg* 1981; 54:615-9
  117. Matta BF, Lam AM, Strebel S, Mayberg TS: Cerebral pressure autoregulation and carbon dioxide reactivity during propofol-induced EEG suppression. *Br J Anaesth* 1995; 74:159-63
  118. Renou AM, Vernhiet J, Macrez P, Constant P, Billerey J, Khadaroo MY, Caillé JM: Cerebral blood flow and metabolism during etomidate anaesthesia in man. *Br J Anaesth* 1978; 50:1047-51
  119. Forster A, Juge O, Morel D: Effects of midazolam on cerebral blood flow in human volunteers. *ANESTHESIOLOGY* 1982; 56:453-5
  120. Vernhiet J, Renou AM, Orgogozo JM, Constant P, Caille JM: Effects of a diazepam-fentanyl mixture on cerebral blood flow and oxygen consumption in man. *Br J Anaesth* 1978; 50:165-9
  121. Harper AM, Glass HI: Effect of alterations in the arterial carbon dioxide tension on the blood flow through the cerebral cortex at normal and low arterial blood pressures. *J Neurol Neurosurg Psychiatry* 1965; 28:449-52
  122. Whitelaw A, Karlsson BR, Haaland K, Dahlin I, Steen PA, Thoresen M: Hypocapnia and cerebral ischaemia in hypotensive newborn piglets. *Arch Dis Child* 1991; 66:1110-4
  123. Raichle ME, Stone HL: Cerebral blood flow autoregulation and graded hypercapnia. *Eur Neurol* 1972; 6:1-5
  124. Artru AA, Katz RA, Colley PA: Autoregulation of cerebral blood flow during normocapnia and hypocapnia in dogs. *ANESTHESIOLOGY* 1989; 70:288-92
  125. Rosenberg AA, Jones MD Jr, Traystman RJ, Simmons MA, Molteni RA: Response of cerebral blood flow to changes in P<sub>CO<sub>2</sub></sub> in fetal, newborn, and adult sheep. *Am J Physiol* 1982; 242:H862-6
  126. Young RSK, Yagel SK: Cerebral physiological and metabolic effects of hyperventilation in the neonatal dog. *Ann Neurol* 1984; 16:337-42
  127. Shapiro HM, Greenberg JH, Naughton KVH, Reivich M: Heterogeneity of local cerebral blood flow-Pa<sub>CO<sub>2</sub></sub> sensitivity in neonatal dogs. *J Appl Physiol* 1980; 49:113-8
  128. Hansen NB, Burbakk A-M, Bratlid D, Oh W, Stonestreet BS: The effects of variations in Pa<sub>CO<sub>2</sub></sub> on brain blood flow and cardiac output in the newborn piglet. *Pediatr Res* 1984; 18:1132-6
  129. Stiris T, Odden J-P, Hansen TWR, Hall C, Bratlid D: The effect of arterial P<sub>CO<sub>2</sub></sub>-variation on ocular and cerebral blood flow in the newborn piglet. *Pediatr Res* 1989; 25:205-8
  130. Helfaer MA, Kirsch JR, Haun SE, Koehler RC, Traystman RJ: Age-related cerebrovascular reactivity to CO<sub>2</sub> after cerebral ischemia in swine. *Am J Physiol* 1991; 260:H1482-8
  131. Yamamoto M, Meyer JS, Sakai F, Yamaguchi F: Aging and cerebral vasodilator responses to hypercarbia responses in normal aging and in persons with risk factors for stroke. *Arch Neurol* 1980; 37:489-96
  132. Reich T, Rusinek H: Cerebral cortical and white matter reactivity to carbon dioxide. *Stroke* 1989; 20:453-7
  133. Schieve JF, Wilson WP: The influence of age, anesthesia and cerebral arteriosclerosis on cerebral vascular activity to CO<sub>2</sub>. *Am J Med* 1953; 15:171-4
  134. Markwalder T-M, Grolimund P, Seiler RW, Roth F, Aaslid R: Dependency of blood flow velocity in the middle cerebral artery on end-tidal carbon dioxide partial pressure—A transcranial ultrasound doppler study. *J Cereb Blood Flow Metab* 1984; 4:368-72
  135. Heistad DD, Marcus ML, Piegers DJ, Armstrong ML: Regulation of cerebral blood flow in atherosclerotic monkeys. *Am J Physiol* 1980; 239:H539-44
  136. Miller JD, Smith RR, Holaday HR: Carbon dioxide reactivity in the evaluation of cerebral ischemia. *Neurosurgery* 1992; 30:518-21
  137. Sugimori H, Ibayashi S, Fujii K, Sadoshima S, Kuwabara Y, Fujishima M: Can transcranial doppler really detect reduced cerebral perfusion states? *Stroke* 1995; 26:2053-60
  138. Ishitsuka T, Fujishima M, Nakatomi Y, Tamaki K, Omae T: Effects of hyperventilation on cerebral blood flow and brain tissue metabolism in normotensive and spontaneously hypertensive rats. *Stroke* 1982; 13:687-92
  139. Novack P, Shenkin HA, Bortin L, Goluboff B, Soffe AM: The effects of carbon dioxide inhalation upon the cerebral blood flow



and cerebral oxygen consumption in vascular disease. *J Clin Invest* 1953; 32:696-702

140. Verhaegen MJJ, Todd MM, Hindman BJ, Warner DS: Cerebral autoregulation during moderate hypothermia in rats. *Stroke* 1993; 24:407-14

141. Prough DS, Stump DA, Roy RC, Gravlee GP, Williams T, Mills SA, Hinshelwood L, Howard G: Response of cerebral blood flow to changes in carbon dioxide tension during hypothermic cardiopulmonary bypass. *ANESTHESIOLOGY* 1986; 64:576-81

142. Hindman BJ, Funatsu N, Harrington J, Cutkomp J, Dexter F, Todd MM, Tinker JH: Cerebral blood flow response to  $\text{Pa}_{\text{CO}_2}$  during hypothermic cardiopulmonary bypass in rabbits. *ANESTHESIOLOGY* 1991; 75:662-8

143. Patel RL, Trutle MR, Chambers DJ, James DN, Newman S, Venn GE: Alpha-stat acid-base regulation during cardiopulmonary bypass improves neuropsychologic outcome in patients undergoing coronary artery bypass grafting. *J Thoracic Cardiovasc Surg* 1996; 111:1267-79

144. Murkin JM, Farrar JK, Tweed WA, McKenzie FN, Guiraudon G: Cerebral autoregulation and flow/metabolism coupling during cardiopulmonary bypass: The influence of  $\text{Pa}_{\text{CO}_2}$ . *Anesth Analg* 1987; 66:825-32

145. Govier AV, Reves JG, McKay RD, Karp RB, Zorn GL, Morawetz RB, Smith LR, Adams M, Freeman AM: Factors and their influence on regional cerebral blood flow during nonpulsatile cardiopulmonary bypass. *Ann Thorac Surg* 1984; 38:592-600

146. Finnerty FA Jr, Witkin L, Fazekas JF: Cerebral hemodynamics during cerebral ischemia induced by acute hypotension. *J Clin Invest* 1954; 33:1227-32

147. Jones TH, Morawetz RB, Crowell RM, Marcoux FW, Fitz-Gibbon SJ, DeGirolami U, Ojemann RG: Thresholds of focal cerebral ischemia in awake monkeys. *J Neurosurg* 1981; 54:773-82

148. Gotof F, Meyer JS, Takagi Y: Cerebral effects of hyperventilation in man. *Arch Neurol* 1965; 12:410-23

149. Reivich M, Cohen PJ, Greenbaum L: Alterations in the electroencephalogram of awake man produced by hyperventilation: Effects of 100% oxygen at 3 atmospheres (absolute) pressure. *Neurology* 1966; 16:303

150. Balke B, Ellis JP Jr, Wells JG: Adaptive responses to hyperventilation. *J Appl Physiol* 1958; 12:269-77

151. Gibbs EL, Gibbs FA, Lennox WG, Nims LF: Regulation of cerebral carbon dioxide. *Arch Neurol Psychiatry* 1942; 47:879-89

152. Granholm L, Siesjö BK: The effect of combined respiratory and nonrespiratory alkalosis on energy metabolites and acid-base parameters in the rat brain. *Acta Physiol Scand* 1971; 81:307-14

153. Carlsson C, Nilsson L, Siesjö B: Cerebral metabolic changes in arterial hypocapnia of short duration. *Acta Anaesthesiol Scand* 1974; 18:104-13

154. van Rijen PC, Luyten PR, van der Sprenkel JWB, Kraaier V, van Huffelen AC, Tulleken CAF, den Hollander JA:  $^1\text{H}$  and  $^{31}\text{P}$  NMR measurement of cerebral lactate, high-energy phosphate levels, and pH in humans during voluntary hyperventilation: Associated EEG, capnographic, and doppler findings. *Magn Reson Med* 1989; 10:182-93

155. Wilson DF, Pastuszko A, DiGiacomo JE, Pawlowski M, Schneiderman R, Delivoria-Papadopoulos M: Effect of hyperventilation on oxygenation of the brain cortex in newborn piglets. *J Appl Physiol* 1991; 70:2691-6

156. Bickler PE, Koh SO, Severinghaus JW: Effects of hypoxia and hypocapnia on brain redox balance in ducks. *Am J Physiol* 1989; 257:R132-5

157. Van der Worp HB, Kraaier V, Wieneke GH, Van Huffelen AC: Quantitative EEG during progressive hypocarbia and hypoxia. hyperventilation-induced EEG changes reconsidered. *Electroencephalogr Clin Neurophysiol* 1991; 79:335-41

158. Torbati D, Simon AJ, Ranade A: Frequency analysis of EEG in rats during the preconvulsive period of  $\text{O}_2$  poisoning. *Aviat Space Environ Med* 1981; 52:598-603

159. Harp JR, Wollman H: Cerebral metabolic effects of hyperventilation and deliberate hypotension. *Br J Anaesth* 1973; 45:256-62

160. Michenfelder JD, Theye RA: The effects of profound hypocapnia and dilutional anemia on canine cerebral metabolism and blood flow. *ANESTHESIOLOGY* 1969; 31:449-57

161. Rosenberg AA: Response of the cerebral circulation to profound hypocarbia in neonatal lambs. *Stroke* 1988; 19:1365-70

162. Grote J, Zimmer K, Schubert R: Effects of severe arterial hypocapnia on regional blood flow regulation, tissue  $\text{PO}_2$  and metabolism in the brain cortex of cats. *Pflügers Arch* 1981; 391:195-9

163. MacMillan V, Siesjö BK: The influence of hypocapnia upon intracellular pH and upon some carbohydrate substrates, amino acids and organic phosphates in brain. *J Neurochem* 1973; 21:1283-99

164. Michenfelder JD, Van Dyke RA, Theye RA: The effects of anesthetic agents and techniques on canine cerebral ATP and lactate levels. *ANESTHESIOLOGY* 1970; 33:315-21

165. Kaku DA, Giffard RG, Choi DW: Neuroprotective effects of glutamate antagonists and extracellular acidity. *Science* 1993; 260:1516-8

166. Drummond JC: Brain protection during anesthesia a reader's guide. *ANESTHESIOLOGY* 1993; 79:877-80

167. Soloway M, Nadel W, Albin MS, White RJ: The effect of hyperventilation on subsequent cerebral infarction. *ANESTHESIOLOGY* 1968; 29:975-80

168. Soloway M, Moriarty G, Fraser JG, White RJ: Effect of delayed hyperventilation on experimental cerebral infarction. *Neurology* 1971; 21:479-85

169. Michenfelder JD, Milde JH: Failure of prolonged hypocapnia, hypothermia, or hypertension to favorably alter acute stroke in primates. *Stroke* 1977; 8:87-91

170. Yamaguchi T, Regli F, Waltz AG: Effect of  $\text{Pa}_{\text{CO}_2}$  on hyperemia and ischemia in experimental cerebral infarction. *Stroke* 1971; 2:139-47

171. Michenfelder JD, Sundt TM Jr: The effect of  $\text{Pa}_{\text{CO}_2}$  on the metabolism of ischemic brain in squirrel monkeys. *ANESTHESIOLOGY* 1973; 38:445-53

172. Sundt TM Jr, Anderson RE: Reduced nicotinamide adenine dinucleotide fluorescence and cortical blood flow in ischemic and nonischemic squirrel monkey cortex. 2. Effects of alterations in arterial carbon dioxide tension, blood pressure, and blood volume. *Stroke* 1975; 6:279-83

173. Stringer WA, Hasso AN, Thompson JR, Hindshaw DB, Jordan KG: Hyperventilation-induced cerebral ischemia in patients with acute brain lesions: Demonstration by Xenon-enhanced CT. *Am J Neuroradiol* 1993; 14:475-84



CO<sub>2</sub> AND THE CEREBRAL CIRCULATION

174. Meyer JS, Fukuuchi Y, Shimazu K, Ohuchi T, Ericsson AD: Abnormal hemispheric blood flow and metabolism in cerebrovascular disease. II. Therapeutic trials with 5% CO<sub>2</sub> inhalation, hyperventilation and intravenous infusion of THAM and mannitol. *Stroke* 1972; 3:157-67
175. Christensen MS, Paulson OB, Olsen J, Alexander SC, Skinhoj E, Dam WH, Lassen NA: Cerebral apoplexy (stroke) treated with or without prolonged artificial hyperventilation: I. Cerebral circulation, clinical course, and cause of death. *Stroke* 1973; 4:568-619
176. Baker WH, Rodman JA, Barnes RW, Hoyt JL: An evaluation of hypocarbia and hypercarbia during carotid endarterectomy. *Stroke* 1976; 7:451-4
177. Pistolesse GR, Agnoli A, Prencipe M, Faraglia V, Fieschi C, Fiorani P, de Leo G, Pastore E, Pisarri F, Semprebene L: Effects of hyperventilation on rCBF during carotid surgery. *Eur Neurol* 1972; 6:350-4
178. Artru AA, Merriman HG: Hypocapnia added to hypertension to reverse EEG changes during carotid endarterectomy. *ANESTHESIOLOGY* 1989; 70:1016-8
179. Shima T, Hossmann K-A, Date H: Pial arterial pressure in cats following middle cerebral artery occlusion I. Relationship to blood flow, regulation of blood flow and electrophysiological function. *Stroke* 1983; 14:713-9
180. Dettmers C, Young A, Rommel T, Hartmann A, Weingart O, Baron J-C: CO<sub>2</sub> reactivity in the ischaemic core, penumbra, and normal tissue 6 hours after acute MCA-occlusion in primates. *Acta Neurochir* 1993; 125:150-5
181. Russell RWR: The reactivity of the pial circulation of the rabbit to hypercapnia and the effect of vascular occlusion. *Brain* 1971; 94:623-34
182. Paulson OB: Regional cerebral blood flow in apoplexy due to occlusion of the middle cerebral artery. *Neurology* 1970; 20:63-77
183. Høedt-Rasmussen K, Skinhoj E, Paulson O, Ewald J, Bjerrum JK, Fahrenkrug A, Lassen NA: Regional cerebral blood flow in acute apoplexy. *Arch Neurol* 1967; 17:271-81
184. Fieschi C, Agnoli A, Battistini N, Bozzao L, Prencipe M: Derangement of regional cerebral blood flow and of its regulatory mechanisms in acute cerebrovascular lesions. *Neurology* 1968; 18:1166-79
185. Nakagawa Y, Ohtsuka K, Tsuru M, Nakamura N: Effects of mild hypercapnia on somatosensory evoked potentials in experimental cerebral ischemia. *Stroke* 1984; 15:275-8
186. Todd MM, Tommasino C, Shapiro HM: Cerebrovascular effects of prolonged hypocarbia and hypercarbia after experimental global ischemia in cats. *Crit Care Med* 1985; 13:720-3
187. Christopherson TJ, Milde JH, Michenfelder JD: Cerebral vascular autoregulation and CO<sub>2</sub> reactivity following onset of the delayed posts ischemic hypoperfusion state in dogs. *J Cereb Blood Flow Metab* 1993; 13:260-8
188. Hossmann K-A, Lechtape-Grüter H, Hossmann V: The role of cerebral blood flow for the recovery of the brain after prolonged ischemia. *Z Neurol* 1973; 204:281-99
189. Mirro R, Lowery-Smith L, Armstead WM, Shibata M, Zuckerman SL, Leffler CW: Cerebral vasoconstriction in response to hypocapnia is maintained after ischemia/reperfusion injury in newborn pigs. *Stroke* 1992; 23:1613-6
190. Choi KT, Chung JK, Kwak CS, Kim HK: Effect of hypocapnia on extracellular glutamate and glycine concentrations during the periischemic period in rabbit hippocampus. *Ann N Y Acad Sci* 1995; 765:86-99
191. Maruki Y, Kochler RC, Eleff SM, Traystman RJ: Intracellular pH during reperfusion influences evoked potential recovery after complete cerebral ischemia. *Stroke* 1993; 24:697-704
192. Fercáková A, Vanicky I, Marsala M, Marsala J: Effect of prolonged hyperventilation on ischemia injury of neurons after global brain ischemia in the dog. *J Brain Res* 1995; 36:297-304
193. Vanicky I, Marsala M, Murár J, Marsala J: Prolonged post-ischemic hyperventilation reduces acute neuronal damage after 15 min of cardiac arrest in the dog. *Neurosci Lett* 1992; 135:167-70
194. Rossanda M, di Giugno G, Corona S, Bettinazzi N, Mangione G: Oxygen supply to the brain and respirator treatment in severe comatose states. *Acta Anaesthesiol Scand* 1996; 23(suppl):766-74
195. Bricolo A, Formenton A, Turella G, Dalle Ore G: Clinical and EEG effects of mechanical hyperventilation in acute traumatic coma. *Eur Neurol* 1972; 8:219-24
196. Gordon E: Controlled ventilation in the management of patients with severe head injuries. *Scand J Rehab Med* 1972; 4:21-3
197. Becker DP, Miller JD, Ward JD, Greenberg RP, Young HF, Sakalas R: The outcome from severe head injury with early diagnosis and intensive management. *J Neurosurg* 1977; 47:491-502
198. Saul TG, Bucker TB: Effect of intracranial pressure monitoring and aggressive treatment on mortality in severe head injury. *J Neurosurg* 1982; 56:498-503
199. Jennett B, Teasdale G, Fry J, Braakman R, Minderhoud J, Heiden J, Kurze T: Treatment for severe head injury. *J Neurol Neurosurg Psychiatry* 1980; 43:289-95
200. Muizelaar JP, Marmarou A, Ward JD, Kontos HA, Choi SC, Becker DP, Gruemer H, Young HF: Adverse effects of prolonged hyperventilation in patients with severe head injury: A randomized clinical trial. *J Neurosurg* 1991; 75:731-9
201. De Salles AAF, Muizelaar JP, Young HF: Hyperglycemia, cerebrospinal fluid lactic acidosis, and cerebral blood flow in severely head-injured patients. *Neurosurgery* 1987; 21:45-50
202. Lassen NA: Control of cerebral circulation in health and disease. *Circ Res* 1974; 34:749-60
203. Inao S, Marmarou A, Clarke GD, Andersen BJ, Fatouros PP, Young HF: Production and clearance of lactate from brain tissue, cerebrospinal fluid, and serum following experimental brain injury. *J Neurosurg* 1988; 69:736-44
204. Yoshida K, Marmarou A: Effects of tromethamine and hyperventilation on brain injury in the cat. *J Neurosurg* 1991; 74:87-96
205. Yundt KD, Diringner MN: The use of hyperventilation and its impact on cerebral ischemia in the treatment of traumatic brain injury. *Crit Care Clin* 1997; 13:163-84
206. Obrist WD, Langfitt TW, Jaggi JL, Cruz J, Gennarelli TA: Cerebral blood flow and metabolism in comatose patients with acute head injury. *J Neurosurg* 1984; 61:241-53
207. Enevoldsen EM, Jensen FT: Autoregulation and CO<sub>2</sub> responses of cerebral blood flow in patients with acute severe head injury. *J Neurosurg* 1978; 48:689-703
208. Fiesche C, Beduschi A, Agnoli A, Battistini N, Collice M,



Prencipe M, Risso M: Regional cerebral blood flow and intraventricular pressure in acute brain injuries. *Eur Neurol* 1972; 8:192-9

209. Sutton LN, McLaughlin AC, Dante S, Kotpka M, Sinwell T, Mills E: Cerebral venous oxygen content as a measure of brain energy metabolism with increased intracranial pressure and hyperventilation. *J Neurosurg* 1990; 73:927-32

210. James HE, Langfitt TW, Kumar VS, Ghostine SY: Treatment of intracranial hypertension. *Acta Neurochir* 1977; 36:189-200

211. Yoshihara M, Bandoh K, Marmarou A: Cerebrovascular carbon dioxide reactivity assessed by intracranial pressure dynamics in severely head injured patients. *J Neurosurg* 1995; 82:386-93

212. Crockard HA, Coppel DL, Morrow WFK: Evaluation of hyperventilation in treatment of head injuries. *BMJ* 1973; 4:634-40

213. Cruz J: An additional therapeutic effect of adequate hyperventilation in severe acute brain trauma: Normalization of cerebral glucose uptake. *J Neurosurg* 1995; 82:379-85

214. Sioutos PJ, Orozco JA, Carter LP, Weinand ME, Hamilton AJ, William FC: Continuous regional cerebral cortical blood flow monitoring in head-injured patients. *Neurosurgery* 1995; 36:943-50

215. Voldby B, Enevoldsen EM, Jensen FT: Cerebrovascular reactivity in patients with ruptured intracranial aneurysms. *J Neurosurg* 1985; 62:59-67

216. White JC, Verlot M, Selverstone B, Beecher HK: Changes in brain volume during anesthesia: The effect of anoxia and hypercapnia. *Arch Surg* 1942; 44:1-21

217. Hunter AR: The theoretical basis of neurosurgical anaesthesia. *Proc R Soc Med* 1952; 45:427-31

218. Osborn JE: Anesthesia for neurosurgical procedures. *JAMA* 1954; 156:589-91

219. Furness DN: Controlled respiration in neurosurgery. *Br J Anaesth* 1957; 29:415-8

220. Lundberg N, Kjällquist Å, Bien C: Reduction of increased intracranial pressure by hyperventilation. *Acta Psychiatr Neurol Scand* 1959; 34(suppl 139):1-64

221. Hayes GJ, Slocum HC: The achievement of optimal brain relaxation by hyperventilation technics of anesthesia. *J Neurosurg* 1962; 19:65-70

222. Galloon S: Controlled respiration in neurosurgical anaesthesia. *Anaesthesia* 1959; 14:223-30

223. Bozza ML, Maspes PE, Rossanda M: The control of brain volume and tension during intracranial operations. *Br J Anaesth* 1961; 33:132-46

224. Marrubini MB, Rossanda M, Tretola L: The role of artificial hyperventilation in the control of brain tension during neurosurgical operations. *Br J Anaesth* 1964; 36:415-31

225. Jennett WB, McDowall DG, Barker J: The effect of halothane on intracranial pressure in cerebral tumors. *J Neurosurg* 1967; 26:270-4

226. Jennett WB, Barker J, Fitch W, McDowall DG: Effect of anaesthesia on intracranial pressure in patients with space-occupying lesions. *Lancet* 1969; 1:61-4

227. Adams RW, Gronert GA, Sundr TM Jr, Michenfelder JD: Halothane, hypocapnia, and cerebrospinal fluid pressure in neurosurgery. *ANESTHESIOLOGY* 1972; 37:510-7

228. McDowall DG, Barker J, Jennett WB: Cerebro-spinal fluid pressure measurements during anaesthesia. *Anaesthesia* 1966; 21:189-201

229. Adams RW, Cucchiara RF, Gronert GA, Messick JM, Michenfelder JD: Isoflurane and cerebrospinal fluid pressure in neurosurgical patients. *ANESTHESIOLOGY* 1981; 54:97-9

230. Todd MM, Drummond JC: A comparison of the cerebrovascular and metabolic effects of halothane and isoflurane in the cat. *ANESTHESIOLOGY* 1984; 60:276-82

231. Campkin TV, Flinn RM: Isoflurane and cerebrospinal fluid pressure—A study in neurosurgical patients undergoing intracranial shunt procedures. *Anaesthesia* 1989; 44:50-4

232. Artru AA: Reduction of cerebrospinal fluid pressure by hypocapnia: Changes in cerebral blood volume, cerebrospinal fluid volume and brain tissue water and electrolytes. II. Effects of anesthetics. *J Cereb Blood Flow Metab* 1988; 8:750-6

233. Todd MM, Warner DS, Sokoll MD, Makatabi MA, Hindman BJ, Scamman FL, Kirschner J: A prospective, comparative trial of three anesthetics for elective supratentorial craniotomy. *ANESTHESIOLOGY* 1993; 78:1005-20

234. Grosslight K, Foster R, Colohan AR, Bedford RF: Isoflurane for neuroanesthesia: Risk factors for increases in intracranial pressure. *ANESTHESIOLOGY* 1985; 63:533-6
